# Supplementary material for: LAparoscopic Versus Abdominal hysterectomy (LAVA): protocol of a randomised controlled trial
Source: PubMed Central journal article supplement — BMJ Open. 2023 Sep 5;13(9):e070218. doi: 10.1136/bmjopen-2022-070218 (PMC10481847; doi:10.1136/bmjopen-2022-070218), 2023-09-05
Supplement: bmjopen-2022-070218.draft_revisions.pdf [file bmjopen-2022-070218.draft_revisions.pdf]

# BMJ Open

BMJ Open is committed to open peer review. As part of this commitment we make the peer review history of every article we publish publicly available.

When an article is published we post the peer reviewers' comments and the authors' responses online. We also post the versions of the paper that were used during peer review. These are the versions that the peer review comments apply to.

The versions of the paper that follow are the versions that were submitted during the peer review process. They are not the versions of record or the final published versions. They should not be cited or distributed as the published version of this manuscript.

BMJ Open is an open access journal and the full, final, typeset and author-corrected version of record of the manuscript is available on our site with no access controls, subscription charges or pay-per-view fees (<http://bmjopen.bmj.com>).

If you have any questions on BMJ Open's open peer review process please email [info.bmjopen@bmj.com](mailto:info.bmjopen@bmj.com)

# BMJ Open

## Laparoscopic Versus Abdominal hysterectomy (LAVA): Protocol of a randomised controlled trial

|                               |                                                                                                                                                                                                                                                                                                                                                                                                                                                                                                                                                                                                                                                                                                                                                                                                                                                                                                                                                                                            |
|-------------------------------|--------------------------------------------------------------------------------------------------------------------------------------------------------------------------------------------------------------------------------------------------------------------------------------------------------------------------------------------------------------------------------------------------------------------------------------------------------------------------------------------------------------------------------------------------------------------------------------------------------------------------------------------------------------------------------------------------------------------------------------------------------------------------------------------------------------------------------------------------------------------------------------------------------------------------------------------------------------------------------------------|
| Journal:                      | <i>BMJ Open</i>                                                                                                                                                                                                                                                                                                                                                                                                                                                                                                                                                                                                                                                                                                                                                                                                                                                                                                                                                                            |
| Manuscript ID                 | bmjopen-2022-070218                                                                                                                                                                                                                                                                                                                                                                                                                                                                                                                                                                                                                                                                                                                                                                                                                                                                                                                                                                        |
| Article Type:                 | Protocol                                                                                                                                                                                                                                                                                                                                                                                                                                                                                                                                                                                                                                                                                                                                                                                                                                                                                                                                                                                   |
| Date Submitted by the Author: | 17-Nov-2022                                                                                                                                                                                                                                                                                                                                                                                                                                                                                                                                                                                                                                                                                                                                                                                                                                                                                                                                                                                |
| Complete List of Authors:     | Antoun, Lina; Birmingham Women's and Children's Hospitals NHS Foundation Trust; University of Birmingham<br>Middleton, Lee; University of Birmingham, School of Health and Population Sciences<br>Smith, Paul; Birmingham Women's and Children's NHS Foundation Trust<br>Saridogan, Ertan; University College London Hospitals, Gynaecology<br>Cooper, Kevin; Aberdeen Royal Infirmary; University of Aberdeen<br>Brocklehurst, Peter; University of Birmingham<br>McKinnon, William; University of Birmingham<br>Bevan, Sheriden; University of Birmingham<br>Woolley, Rebecca; University of Birmingham, Birmingham Clinical Trials Unit<br>Jones, Laura; University of Birmingham, Public Health, Epidemiology & Biostatistics<br>Fullard, Jayne; University of Birmingham<br>Morgan, Monique; University of Birmingham<br>Roberts, Tracy; University of Birmingham, Health Economics Unit<br>Clark, T; Birmingham Women's NHS Foundation Trust, Gynaecology; University of Birmingham, |
| Keywords:                     | Minimally invasive surgery < GYNAECOLOGY, GYNAECOLOGY, Health economics < HEALTH SERVICES ADMINISTRATION & MANAGEMENT                                                                                                                                                                                                                                                                                                                                                                                                                                                                                                                                                                                                                                                                                                                                                                                                                                                                      |
|                               |                                                                                                                                                                                                                                                                                                                                                                                                                                                                                                                                                                                                                                                                                                                                                                                                                                                                                                                                                                                            |

SCHOLARONE™  
Manuscripts

1  
2  
3 1 **Laparoscopic Versus Abdominal hysterectomy (LAVA): Protocol of a**  
4  
5 2 **randomised controlled trial**  
6  
7  
8 3

9  
10 4 **Lina Antoun**, MD, MRCOG, Specialist Registrar Obstetrics and Gynaecology and Clinical  
11  
12 5 Research Fellow, Birmingham Women's NHS Foundation Trust, Birmingham, B15 2TG UK  
13  
14 6 and University of Birmingham, B15 2TT UK

15  
16 7 **Lee Middleton**, BSc (Hons), MSc, School of Health and Population Sciences, University of  
17  
18 8 Birmingham, B15 2TT UK

19  
20 9 **Paul Smith**, PhD, MRCOG Consultant Obstetrician and Gynaecologist, Birmingham  
21  
22 10 Women's NHS Foundation Trust, Birmingham, B15 2TG UK

23  
24 11 **Ertan Saridogan**, PhD, FRCOG, Consultant Gynaecologist and Professor, University  
25  
26 12 College London Hospital, London NW1 2PG and University College London Elizabeth  
27  
28 13 Garrett Anderson Institute for Women's Health, London WC1E 6AU

29  
30 14 **Kevin Cooper**, MSc, MD, MRCOG, Consultant Gynaecologist and Professor, Aberdeen  
31  
32 15 Royal Infirmary, NHS Grampian, Aberdeen, AB25 2ZN and University of Aberdeen AB24  
33  
34 16 3FX

35  
36 17 **Peter Brocklehurst**, MBChB, MSc, FRCOG, FFPH, FMedSci, Professor of Women's Health  
37  
38 18 and Director of Research and Development, Institute of Applied Health Research, University  
39  
40 19 of Birmingham, Birmingham, B15 2TT, UK

41  
42 20 **William McKinnon**, Dr, Trials Manager Team Leader, Birmingham Clinical Trial Unit,  
43  
44 21 University of Birmingham, Birmingham, B15 2TT, UK

45  
46 22 **Sheriden Bevan**, Senior Trial Manager, Institute of Applied Health Research, University of  
47  
48 23 Birmingham, Birmingham, B15 2TT, UK

49  
50 24 **Rebecca Woolley**, Miss, Senior Medical Statistician, Birmingham Clinical Trial Unit,  
51  
52 25 University of Birmingham, Birmingham, B15 2TT, UK

53  
54 26 **Laura Jones**, BSc (Hons), DPS, PhD, PCAP, FHEA, Institute of Applied Health Research,  
55  
56 27 University of Birmingham, Birmingham, B15 2TT, UK  
57  
58  
59  
60

1  
2  
3 28 **Jayne Fullard**, Mrs, Patient and Public Involvement, Birmingham  
4

5 29 **Monique Morgan**, Mrs, Patient and Public Involvement, Birmingham  
6

7 30 **Tracy Roberts**, PhD, MPhil(Econ), BSc(Econ)(Hons) RG, Professor of Health Economics  
8

9 31 and Head of Unit, Institute of Applied Health Research, University of Birmingham,  
10

11 32 Birmingham, B15 2TT, UK  
12

13 33 **T. Justin Clark**, MD, FRCOG Consultant Gynaecologist and Honorary Professor,  
14

15 34 Birmingham Women's NHS Foundation Trust, Birmingham, B15 2TG UK and University of  
16

17 35 Birmingham, Birmingham, B15 2TT UK  
18  
19

20 36

21  
22 37 **Address for correspondence:**  
23

24 38 Dr Lina Antoun, Specialist Registrar Obstetrics and Gynaecology and Clinical Research  
25

26 39 Fellow, Birmingham Women's NHS Foundation Trust, Birmingham, B15 2TG UK and  
27

28 40 University of Birmingham, B15 2TT UK  
29

30 41 E-mail: antoun.lina@gmail.com  
31

32 42 Tel: 0044 121 607 4712  
33  
34

35 43

36 44  
37  
38  
39  
40  
41  
42  
43  
44  
45  
46  
47  
48  
49  
50  
51  
52  
53  
54  
55  
56  
57  
58  
59  
60

1  
2  
3 45 **Abstract**  
4

5 46

6  
7 47 Introduction  
8  
9

10 48 There is uncertainty about the advantages and disadvantages of laparoscopic hysterectomy  
11  
12 49 compared with abdominal hysterectomy, particularly the relative rate of complications of the  
13  
14 50 two procedures. Whilst uptake of laparoscopic hysterectomy has been slow, the situation is  
15  
16 51 changing with greater familiarity, better training, better equipment and increased proficiency  
17  
18 52 in the technique. Thus, a large, robust, multi-centre randomised controlled trial (RCT) is  
19  
20 53 needed to compare contemporary laparoscopic hysterectomy with abdominal hysterectomy  
21  
22 54 to determine the safest and most cost-effective technique.  
23  
24

25  
26 55 Methods and analysis  
27

28 56 A parallel, open, non-inferiority, multicentre, randomised controlled, expertise-based surgery  
29  
30 57 trial with integrated health economic evaluation and an internal pilot with an embedded  
31  
32 58 qualitative process evaluation. A within trial-based economic evaluation will explore the cost-  
33  
34 59 effectiveness of laparoscopic hysterectomy compared to open abdominal hysterectomy. We  
35  
36 60 will aim to recruit 3250 women requiring a hysterectomy for a benign gynaecological  
37  
38 61 condition and who were suitable for either laparoscopic or open techniques. The primary  
39  
40 62 outcome is major complications up to six completed weeks post-surgery and the key  
41  
42 63 secondary outcome is time from surgery to resumption of usual activities using the  
43  
44 64 personalised PROMIS-SF (Patient-Reported Outcomes Measurement Information System  
45  
46 65 Physical Function) questionnaire. The principal outcome for the economic evaluation is to  
47  
48 66 be cost per QALY at 12 months' post-surgery. A secondary analysis is to be undertaken to  
49  
50 67 generate costs per major surgical complication avoided and costs per return to normal  
51  
52 68 activities.  
53  
54

55  
56 69 Ethics and dissemination  
57  
58  
59  
60

1  
2  
3 70 The study was approved by the West Midlands-Edgbaston Research Ethics Committee, 18th  
4  
5 71 February-2021 (Ethics ref: 21/WM/0019). We will present the findings in national and  
6  
7 72 international conferences. We will also aim to publish the findings in high impact peer  
8  
9 73 reviewed journals. We will disseminate the completed paper to the Department of Health,  
10  
11 74 the Scientific Advisory Committees of the RCOG, the Royal College of Nurses (RCN) and  
12  
13 75 the BSGE.  
14  
15  
16 76 Trial registration: University of Birmingham, ISRCTN14566195.  
17  
18  
19 77  
20  
21  
22  
23  
24  
25  
26  
27  
28  
29  
30  
31  
32  
33  
34  
35  
36  
37  
38  
39  
40  
41  
42  
43  
44  
45  
46  
47  
48  
49  
50  
51  
52  
53  
54  
55  
56  
57  
58  
59  
60

1  
2  
3 78 **Strengths and limitations of this study**  
4

- 5 79 • The LAVA trial is larger than all the previous 25 RCTs evaluating laparoscopic and  
6  
7 80 open hysterectomy and of higher quality, addressing the methodological deficiencies  
8  
9 81 of previous trials; namely their power to show a meaningful difference, accounting for  
10  
11 82 surgical expertise bias and the ensuring the validity of outcomes assessments,  
12  
13 83 especially the key secondary outcome of personalised recovery  
14  
15  
16 84 • In the LAVA trial a novel, validated, personalised recovery tool is used via SMS and  
17  
18 85 an expertise-based design to mitigate against surgical expertise bias employed.  
19  
20  
21 86 • Third part randomisation is to be performed balancing important prognostic variables.  
22  
23  
24 87 • Due to the differing natures of the intervention it is impossible to blind either the care  
25  
26 88 providers, investigators or participants to their allocated group.  
27  
28  
29  
30 89  
31  
32 90  
33  
34  
35 91  
36  
37  
38  
39  
40  
41  
42  
43  
44  
45  
46  
47  
48  
49  
50  
51  
52  
53  
54  
55  
56  
57  
58  
59  
60

## 92 Introduction

93  
94 Hysterectomy is common, with one in ten women undergoing the procedure in their lifetime,  
95 mostly for benign conditions [1,2,3]. 30,000 women undergo a hysterectomy every year in  
96 the UK for benign indications such as abnormal uterine bleeding and pelvic pain [1,2,3]. The  
97 procedure is associated with high rates of patient satisfaction and improvement in quality of  
98 life (QoL) but serious complications can arise [4, 5]. The morbidity arising from hysterectomy  
99 imposes a burden on women and the ubiquity of the procedure utilises a substantial amount  
100 of scarce health care resources [6,7,8,9]. Currently, most hysterectomies are performed by  
101 laparotomy, through a vertical or transverse incision because this traditional method is  
102 thought to minimise intra-operative complications but the increased trauma of an abdominal  
103 incision can prolong recovery [5]. This may be especially true in overweight and obese  
104 women, where morbidity is greater from mobility restrictions and wound infection [10].

105  
106 Several RCTs, mostly small and of low or moderate quality, have compared the surgical  
107 approach to hysterectomy for benign disease. The 2015 Cochrane review identified 25 trials  
108 (2983 women) comparing laparoscopic and abdominal hysterectomy [5]. Laparoscopic  
109 hysterectomy was found to have significantly more urinary tract injuries (bladder or ureter)  
110 but the available evidence was of low quality. The largest RCT included in this review was  
111 conducted over 15 years ago, when laparoscopic hysterectomy was in its infancy [11].  
112 Smaller, but more recent trials of laparoscopic hysterectomy, have shown a trend towards a  
113 lower major complication rate [12,13,14,15]. The Cochrane review [5] identified no  
114 differences in the costs or outcomes apart from return to normal activities, which was shorter  
115 in the laparoscopic hysterectomy group by 14 days on average.

116  
117 A systematic review of cost-effectiveness studies of hysterectomy, found laparoscopic  
118 hysterectomy to be the least cost-effective but the authors felt that conclusions were difficult  
119 to draw due to variation in study design, follow up times, and the QoL measurement used



1  
2  
3 120 [16]. Thus, we designed a large RCT to determine the clinical and cost-effectiveness of  
4  
5 121 laparoscopic hysterectomy compared to open abdominal hysterectomy for women with a  
6  
7 122 benign gynaecological condition.  
8

9 123

10 124

## 11 125 **Methods and analysis**

12 126

### 13 127 ***Aims and objectives***

14 128 *Main clinical objectives:* To compare laparoscopic hysterectomy with open abdominal  
15 129 hysterectomy in terms of major intra-operative and post-operative surgical complications (up  
16 130 to six weeks). Post-operative recovery will also be evaluated by measuring the time from  
17 131 surgery to resumption of usual activities.  
18

19 132

20 133 *Economic objectives:* To compare the relative cost effectiveness of laparoscopic  
21 134 hysterectomy with open abdominal hysterectomy in terms of cost per quality adjusted life  
22 135 year. Additional cost-effectiveness analyses will explore cost per major surgical complication  
23 136 avoided and cost per return to normal activities.  
24

25 137

### 26 138 ***Study design and setting***

27 139 The study is designed as a parallel, open, non-inferiority, multicentre, randomised controlled,  
28 140 expertise-based surgery trial with integrated health economic evaluation and an internal pilot  
29 141 with an embedded qualitative process evaluation to assess the ability of the study to recruit  
30 142 and randomise.

31 143 Recruitment to the LAVA study will take place in gynaecology departments (general and  
32 144 relevant specialist clinics including menstrual disorders and pelvic pain clinics, hysteroscopy  
33 145 and colposcopy services) in up to 50 NHS Hospitals within the UK.  
34

35 146

### 36 147 ***Patient and Public Involvement (PPI)***

1  
2  
3 148 Our research has been developed with involvement of members of the RCOG Women's  
4  
5 149 Voices group, the Hysterectomy Association, and the Birmingham Women's Hospital  
6  
7 150 Hysterectomy Focus Group. A total of 945 women responded to our PPI survey. Major  
8  
9 151 complications were ranked as the most important outcome for the trial to assess, with return  
10  
11 152 to usual activities considered the second most important outcome (ranked in the top three  
12  
13 153 most important outcomes in the BSGE survey). A measure of the speed and quality of  
14  
15 154 recovery was also considered one of the most important outcomes to measure after major  
16  
17 155 complications and improvement in QoL in the PPI survey.  
18  
19 156 Two focus groups felt the burden placed upon women from administering outcome  
20  
21 157 questionnaires at 24 hours' post-surgery and the frequency of dissemination post-  
22  
23 158 operatively proposed was acceptable. Indeed, the consensus view was that measuring  
24  
25 159 recovery against pre-set targets was a good thing (with tools already available on the  
26  
27 160 internet). This frequency of contact was also supported by the PPI survey; 6 weeks 485/945  
28  
29 161 (51%) and 12 months 514/945 (54%) were the most popular time points.  
30  
31 162 Overall almost 50% (462/945) of PPI survey respondents were willing to consider taking part  
32  
33 163 in the proposed trial. Excluding the 483 women declining to participate because they had  
34  
35 164 already undergone a hysterectomy revealed that 63% (292/462) of respondents were willing  
36  
37 165 to take part, with the remainder being "not sure".  
38  
39 166 Results of the study will be shared with study participants, staff members at research sites  
40  
41 167 and investigators of other studies related to hysterectomy and benign gynaecological  
42  
43 168 surgery. A formal notification to the ethics committee, Department of Health, key partners  
44  
45 169 and sponsors will be made. Outreach to other key stakeholders (trial networks, health  
46  
47 170 advocates) involved in related trials is planned. The trial team has key individuals to optimise  
48  
49 171 the dissemination of results. With our PPI co-applicants and contacts we will produce  
50  
51 172 effective, contemporary formats for dissemination e.g. the use of video podcasts and social  
52  
53 173 media outlets.  
54  
55  
56  
57  
58 174  
59  
60

1  
2  
3 1754  
5 176 **Participants**6  
7 177 Women are eligible for recruitment to the LAVA trial if they meet the following inclusion  
8  
9 178 criteria and do not have any of the exclusion criteria set out below:10  
11 179 *Inclusion Criteria*

- 12
- 
- 13 180
- 14 • Aged between 18-55 years of age and able to give informed consent to participate
  - 15 181 • Have a benign gynaecological condition that is being treated with a hysterectomy
  - 16 182 • This hysterectomy can be undertaken by either a laparoscopic or open abdominal
  - 17 183 routes

18  
19 184 *Exclusion Criteria*

- 20
- 
- 21 185
- 22 • Women with suspected malignant disease of the genital tract
  - 23 186 • Women who require concomitant gynaecological surgery for bladder or other pelvic
  - 24 187 support
  - 25 188 • Women who require concomitant gynaecological surgery for excision of deep
  - 26 189 endometriosis that requires dissection of the para-rectal space

27  
28 19029  
30 191 **Choice of intervention**31 192 The LAVA trial will compare laparoscopic with conventional abdominal  
32 193 hysterectomy. Vaginal hysterectomy has been shown to be beneficial in terms of  
33 194 complications and recovery but this technique is largely confined to women with prolapse  
34 195 and where the uterus is not enlarged [17]. Whilst the uptake of laparoscopic hysterectomy  
35 196 has been slow [18], the situation is changing with greater familiarity, better training, better  
36 197 equipment and increased proficiency in the technique, such that nearly as many  
37 198 hysterectomies for benign disease are now being done laparoscopically as abdominally [18].  
38 19939 200 Contemporary gynaecological practice has developed rapidly in response to technological  
40 201 advances facilitating less invasive surgical techniques for common operations aligned with  
41  
42  
43  
44  
45  
46  
47  
48  
49  
50  
51  
52  
53  
54  
55  
56  
57  
58  
59  
60

1  
2  
3 202 innovations in pre, peri- and post-operative care designed to 'enhance' recovery [20]. The  
4  
5 203 results of this trial will have a significant impact on day-to-day clinical practice in women's  
6  
7 204 health care.  
8

9 205

### 11 206 **Recruitment and randomisation**

13 207 Women with benign gynaecological conditions requiring a hysterectomy and who are  
14  
15 208 suitable for either surgical technique are eligible for inclusion in the LAVA trial. Potential  
16  
17 209 participants will be provided with a REC approved Study Participant Information Sheet (PIS)  
18  
19 210 and given time to consider their involvement.  
20  
21

22  
23 211 After participant eligibility is confirmed and informed consent received, the baseline  
24  
25 212 questionnaires are to be completed and then the participant randomised into the trial.

26  
27 213 Baseline data collected includes demographic and medical data (age ethnicity, BMI  
28  
29 214 ( $\leq 29.9$ ,  $30-34.9$ ,  $\geq 35$  Kg/m<sup>2</sup>), previous caesarean section (yes / no), uterine size  $\leq 12$   
30  
31 215 weeks,  $>12$  weeks, planned retention of cervix yes / no); Patient-Reported Outcomes  
32  
33 216 Measurement Information System Physical Function (PROMIS-PF) item bank v1.2 [16] (see  
34  
35 217 "key secondary outcome"); quality of life, symptom and physical functioning questionnaires,  
36  
37 218 EuroQoL EQ-5D-5L and EQ VAS [15], Urogenital Distress Inventory (UDI) [28], Pelvic organ  
38  
39 219 prolapse symptom score (POP-SS) [28], Defecatory Distress Inventory (DDI) [31], Sexual  
40  
41 220 Activity Questionnaire (SAQ) [32].  
42  
43

44 221  
45  
46 222 Randomisation is provided by a secure online randomisation system at the Birmingham  
47  
48 223 Clinical Trials Unit (BCTU) (available at <http://www.trials.bham.ac.uk/lava>). Participants will  
49  
50 224 be randomised at the level of the individual in a 1:1 ratio to undergo their hysterectomy by  
51  
52 225 either a laparoscopic or open abdominal route. A minimisation algorithm will be used within  
53  
54 226 the online randomisation system to ensure balance in the treatment allocation over the  
55  
56 227 following variables:

- 58 228 • Previous caesarean section (yes / no)
- 59  
60

- 229 • BMI ( $\leq 29.9$ , 30-34.9,  $\geq 35$  Kg/m<sup>2</sup>)
- 230 • Uterine Size ( $\leq 12$  weeks,  $> 12$  weeks)
- 231 • Planned retention of cervix (yes / no)
- 232 • Recruiting centre

### 234 ***Interventions and expertise-based surgery***

235 Hysterectomy is undertaken by either a laparoscopic or an open abdominal route, by a  
236 surgeon who had self-declared as having expertise in laparoscopic hysterectomy, abdominal  
237 hysterectomy or both approaches to hysterectomy. Satisfactory experience requires  
238 surgeons to have performed a minimum of 30 cases and to have a current caseload of at  
239 least 12 cases per year. For surgeons to conduct both procedures, these criteria will need to  
240 be met for both procedures. The decision to remove or retain cervix (total or sub-total) or  
241 remove and retain ovaries was left to the discretion of the participant in consultation with her  
242 gynaecologist. The expertise design process for eligible centres is depicted in (Figure 1)

### 245 ***Outcome Measures***

246 Women who give consent in a face to face setting will subsequently complete their baselines  
247 questionnaires and then proceed to randomisation. The baseline questionnaires are self-  
248 explanatory but help to complete them will be provided by the local or central medical  
249 research teams on request using remote means (telephone / VOIP /video consultation)  
250 where feasible. Participants will be made aware of this resource by the local research teams.  
251 It is anticipated that some participants may need help to select their 8 personalised recovery  
252 targets from 29 options PROMIS-PF (Patient-Reported Outcomes Measurement Information  
253 System Physical Function) item bank v1.2 [16], [21,22,23]. Local research teams will offer  
254 remote (telephone, VOIP or video) contact, or exceptionally face to face appointments, to  
255 provide explanation.

1  
2  
3 2564  
5 **257 Trial Outcomes**6  
7 **258 Primary Outcome**8  
9 259 Major surgical complications. These will be objectively ascribed and largely in accordance10  
11 260 with the validated and widely used Clavien-Dindo classification of surgical complications12  
13 261 [24]. They will be defined as any of the following up to and including six full weeks' post-14  
15 262 surgery: i) all Clavien-Dindo grade III-V complications ii) Clavien-Dindo grade II16  
17 263 complications of pulmonary embolus or blood transfusion or; iii) haemorrhage  $\geq$  1L or; iv)18  
19 264 major adverse anaesthetic event.20  
21 265 However, other less common major surgical or anaesthetic complications may arise and22  
23 266 these will be ascribed in accordance with the appropriate Clavien-Dindo classification shown24  
25 267 in (Table 1)26  
27 26828  
29 269 TABLE 130  
31 270 DEFINITION OF MAJOR SURGICAL COMPLICATIONS IN THE LAVA TRIAL32  
33 271

|                         |                                                                                                                                                                                                                              |
|-------------------------|------------------------------------------------------------------------------------------------------------------------------------------------------------------------------------------------------------------------------|
| Major haemorrhage       | Haemorrhage $\geq$ 1L                                                                                                                                                                                                        |
| Clavien-Dindo grade II  | Pulmonary embolus, blood transfusion                                                                                                                                                                                         |
| Clavien-Dindo grade III | Complication requiring surgical, endoscopic or radiological intervention                                                                                                                                                     |
| Clavien-Dindo grade IV  | Life-threatening complication requiring management on a High Dependency Unit (HDU) / intensive therapy unit (ITU)*                                                                                                           |
| Clavien-Dindo grade V   | Death                                                                                                                                                                                                                        |
| Major anaesthetic event | Anaphylaxis, awareness, nerve injury (including epidural/spinal anaesthesia), hypoxic brain injury, malignant hyperthermia, iatrogenic complication (e.g. pneumothorax from central line, limb ischaemia from arterial line) |

34  
35 27236  
37 273 \*Non-life threatening elective or precautionary admission to an HDU (e.g. because of medical co-morbidities)38  
39 274 post-operatively will not be considered a grade IV complication.40  
41 275

1  
2  
3 276 Complication data occurring during and up to 6 weeks following hysterectomy will be  
4  
5 277 collected from the relevant case report forms completed by the local research team:  
6

7 278

9 279 *Key secondary outcome*

11 280 Time from surgery to resumption of usual activities. To increase accuracy and to minimise  
12  
13 281 recall bias, the validated, personalised PROMIS-PF (Patient-Reported Outcomes  
14  
15 282 Measurement Information System Physical Function) item bank v1.2 will be used [16]. 29  
16  
17 283 items covering relevant activities for our study population will be used from the entire 121  
18  
19 284 item bank [21]. Every item contains five response categories.

22 285 At baseline participants were asked to select 8 activities from this list of 29 that, in their view,  
23  
24 286 would most reflect their day-to-day activities. In this way participants created their  
25  
26 287 personalised physical function short form. Participants will record when each activity is  
27  
28 288 resumed, with full recovery being achieved once all 8 personalised activities have been  
29  
30 289 resumed. Until all personalised activities have resumed participants will be asked to  
31  
32 290 complete this weekly for the first 12 weeks, then fortnightly from week 13 to week 26 after  
33  
34 291 which requests will cease.

36 292

39 293 *Other secondary outcomes*

41 294 1- Surgical outcomes:

43 295 ○ Duration of operation, (minutes)

45 296 ○ Estimated blood loss, (ml)

47 297 2- In hospital stay:

49 298 ○ In hospital post-operative pain using a Numerical rating scale (NRS) (with 0  
51 299 indicating no pain to 10 indicating maximum pain)\*, measured daily

53 300 ○ Total analgesia use\*

55 301 ○ Overall quality of recovery score taken from the Quality of Recovery 15 (QoR-  
57 302 15) questionnaire [25] (with 0 indicating worst recovery and 10 indicating best  
58 303 recovery), measured at approximately 24 hours post-operation\*

- 1  
2  
3 304           ○ Time from operation to discharge in days  
4  
5 305       3- Up to 14 days after surgery:  
6  
7 306           ○ Post-operative pain using a Numerical rating scale (NRS) (with 0 indicating  
8  
9 307           no pain to 10 indicating maximum pain), measured daily  
10  
11 308           ○ Total analgesia use  
12  
13 309           ○ Overall quality of recovery score taken from the Quality of Recovery 15 (QoR-  
14  
15 310           15) questionnaire<sup>25</sup> (with 0 indicating worst recovery and 10 indicating best  
16  
17 311           recovery), measured at approximately 24 hours post-operation\*  
18  
19 312           ○ Time from operation to discharge in days  
20  
21  
22 313       4- Up to 6 weeks post-surgery:  
23  
24 314           ○ Minor complications (Haemorrhage 500mL to  $\leq$ 1 L; pyrexia [presumed  
25  
26 315           infection] requiring antibiotics; pain uncontrolled with usual analgesic  
27  
28 316           management; urinary retention requiring re-catheterization; catheterisation for  
29  
30 317           longer than 72 hrs; pelvic haematoma NOT requiring radiological or surgical  
31  
32 318           intervention; pelvic abscess NOT requiring radiological or surgical  
33  
34 319           intervention; wound infections/complications managed at the bedside or on  
35  
36 320           the ward)  
37  
38 321           ○ Representation to hospital  
39  
40 322           ○ Readmission to hospital  
41  
42 323           ○ Use of health services  
43  
44 324           ○ Time away from normal activities  
45  
46  
47 325       5- 6 weeks post-surgery:  
48  
49 326           ○ Quality of life score using EuroQol-5D-5L questionnaire [26] (with -0.285  
50  
51 327           indicating worst possible value and 1.0 as best possible value)  
52  
53 328           ○ Quality of life score using EuroQol-5D-5L visual analogue scale (with 0  
54  
55 329           indicating worst possible score and 100 as best possible score)  
56  
57  
58 330       6- 12 weeks post-surgery:  
59  
60



- 1  
2  
3 331 ○ Quality of life score using EuroQol-5D-5L questionnaire [26] (with -0.285  
4  
5 332 indicating worst possible value and 1.0 as best possible value)  
6  
7 333 ○ Quality of life score using EuroQol-5D-5L visual analogue scale  
8  
9 334 ○ Time from surgery to work (if working) in days  
10  
11 335 ○ Work productivity and activity impairment scores using WPAI-GH questionnaire  
12  
13 336 [27] (absenteeism score; presenteeism score; work productivity loss score;  
14  
15 337 activity impairment score – all scored 0 good to 100 bad) at 12 weeks only  
16  
17  
18 338 7- 12/24/36 months post-surgery:\*\*  
19  
20  
21 339 ○ Satisfaction with hysterectomy  
22  
23 340 ○ Symptoms of urogenital prolapse using the Pelvic Organ Prolapse Symptom  
24  
25 341 Score (POP-SS) questionnaire [28]  
26  
27 342 ○ Bladder function using Urogenital Distress Inventory (UDI) [29,30] questionnaire  
28  
29 343 ○ Bowel function using Defecatory Distress Inventory (DDI) [31] questionnaire  
30  
31 344 ○ Sexual function using the Sexual Activity (SAQ) questionnaire [32]  
32  
33 345 ○ Quality of life score using EuroQol-5D-5L questionnaire  
34  
35 346 ○ Quality of life score using EuroQol-5D-5L visual analogue scale  
36  
37 347 ○ Body image using the Body Image Scale (BIS) questionnaire [33]  
38  
39 348 ○ New gynaecological symptoms (abdominal pain [cyclical, non-cyclical and  
40  
41 349 dyspareunia] and vaginal bleeding; yes/no)  
42  
43  
44 350 ○ Contact with Community Social and Clinical Care Services i.e. outpatients or  
45  
46 351 emergency visits, and hospital services e.g. re-presentations, re-admissions,  
47  
48 352 outpatient appointments and further medical treatment, time away from normal  
49  
50 353 activities.

52 354 8- Throughout: Serious adverse events

55 355 \* Questionnaire may be completed at home if patient discharged on the same day as  
56  
57 356 surgery

357 \*\*The latter two time-points will only be collected for participants who reach these times prior  
 358 to the study closes after all patients have been followed up for 12 months.

359  
 360 A SUMMARY OF THE SCHEDULE OF ASSESSMENTS IS SHOWN IN (TABLE 2) AND THE TRIAL  
 361 FLOW DIAGRAM SHOWN IN (FIGURE 2)

362  
 363 TABLE 2  
 364 SUMMARY OF SCHEDULE OF ASSESSMENTS

365

| Visit                                                                                  | Pre-randomisation         |          | Rand | Surgery | Post-surgery  |          |                     |             |                    |                                  |                   |   |
|----------------------------------------------------------------------------------------|---------------------------|----------|------|---------|---------------|----------|---------------------|-------------|--------------------|----------------------------------|-------------------|---|
|                                                                                        | Screening and recruitment | Baseline |      |         | Hospital stay | Day 2-14 | Weekly Week 1 to 12 | 6 weeks +28 | 12 weeks + 28 days | Fortnightly weeks 13 to 26 (inc) | Month 12+6 months |   |
| Eligibility check                                                                      | X                         |          |      |         |               |          |                     |             |                    |                                  |                   |   |
| Valid informed consent                                                                 | X                         |          |      |         |               |          |                     |             |                    |                                  |                   |   |
| Baseline Demographic and medical questionnaire                                         |                           | x        |      |         |               |          |                     |             |                    |                                  |                   |   |
| Urogenital Distress Inventory (UDI)                                                    |                           | x        |      |         |               |          |                     |             |                    |                                  |                   | X |
| Defecatory Distress Inventory (DDI)                                                    |                           | x        |      |         |               |          |                     |             |                    |                                  |                   | X |
| Sexual Activity Questionnaire (SAQ)                                                    |                           | x        |      |         |               |          |                     |             |                    |                                  |                   | X |
| EuroQol (EQ-5D-5L and EQ VAS)                                                          |                           | x        |      |         |               |          |                     | x           | x                  |                                  |                   | X |
| Patient-Reported Outcomes Measurement Information System Physical Function (PROMIS-PF) |                           | x        |      |         |               |          | x                   |             |                    | x                                |                   |   |
| Randomisation                                                                          |                           |          | x    |         |               |          |                     |             |                    |                                  |                   |   |
| Surgery CRF                                                                            |                           |          |      | x       |               |          |                     |             |                    |                                  |                   |   |
| Resource use CRF                                                                       |                           |          |      |         | x             |          |                     |             |                    |                                  |                   |   |
| Pain (Numerical Rating Scale - NRS) & analgesia questionnaire                          |                           |          |      |         | x             |          |                     |             |                    |                                  |                   |   |
| Time to discharge & complications                                                      |                           |          |      |         | x             |          |                     |             |                    |                                  |                   |   |
| Quality of Recovery-15 questionnaire                                                   |                           |          |      |         | x             |          |                     |             |                    |                                  |                   |   |
| Pain (NRS) Symptom diary                                                               |                           |          |      |         |               | x        |                     |             |                    |                                  |                   |   |
| Six week post-surgery questionnaire including health care utilisation                  |                           |          |      |         |               |          |                     | x           |                    |                                  |                   |   |

60

1  
2

|                                                                                                                   |  |   |  |   |   |   |   |   |   |   |   |   |
|-------------------------------------------------------------------------------------------------------------------|--|---|--|---|---|---|---|---|---|---|---|---|
| 3 Work questionnaire<br>4 / Work Productivity<br>5 and Activity<br>6 Impairment<br>7 Questionnaire<br>8 (WPAI-GH) |  |   |  |   |   |   |   |   | x |   |   |   |
| 9 Six week post-<br>10 surgery<br>11 complication and<br>12 representation form                                   |  |   |  |   |   |   |   | x |   |   |   |   |
| 13 Satisfaction with<br>14 hysterectomy                                                                           |  |   |  |   |   |   |   |   |   |   |   | x |
| 15 New gynae<br>16 symptoms                                                                                       |  |   |  |   |   |   |   |   |   |   |   | x |
| 17 Pelvic organ<br>18 prolapse<br>19 quantifications –<br>20 POP-SS                                               |  | x |  |   |   |   |   |   |   |   |   | x |
| 21 Body Image Scale<br>22 (BIS)                                                                                   |  |   |  |   |   |   |   |   |   |   |   | x |
| 23 Contact with<br>24 Community Social<br>25 and Clinical Care<br>26 Services form                                |  |   |  |   |   |   |   |   |   |   |   | x |
| 27 Serious Adverse<br>28 Events                                                                                   |  |   |  | x | x | x | x | x | x | x | x | x |

29 366

30 367 Rand = randomisation

31 368 \* If patient discharged as a day-case then they should be instructed to complete at home at 24 hours post-

32 369 surgery

33 370 \*\* The same 12-month post-surgery questionnaires will be sent to all participants reaching 24 and 36 months of

34 371 follow up post-surgery, prior to close of the LAVA study; defined as when the last randomised patient reaches 12

35 372 months follow up post-surgery

36 373

37 374

38 374 **Statistical consideration**39 375 **Sample size**

40 376 To enable 90% power to test the non-inferiority hypothesis at a one-sided 2.5% significance

41 377 level (two-sided 5% level) assuming a 3% margin of non-inferiority and a major surgical

42 378 complication rate of 6% in the abdominal (control) group requires 2634 participants. The

43 379 estimate of 6% is taken from a similar previous comparative study [11]. A 3% margin is

44 380 justifiable because of the trade-off of potentially swifter recovery with laparoscopic surgery; a

45 381 view shared by our patient focus group and is substantially less than the 5% difference

46 382 observed in the previous major trial [11] which led to the continued use of open abdominal

47 383 hysterectomy.

48 384

49 384

50 384

51 384

52 384

53 384

54 384

55 384

56 384

57 384

58 384

59 384

60 384

1  
2  
3 385 An extra consideration is the potential for clustering by surgeon due to the expertise based  
4  
5 386 design [19,34] Under the assumption that each of the 50 centres will utilise 6 surgeons  
6  
7 387 (operating on approximately 9 patients on average during the study), along with an intra-  
8  
9 388 cluster correlation (ICC) estimate of 0.02, the sample size has been increased by 16% to  
10  
11 389 3055. This ICC estimate used - in the absence of precise estimates - is considered  
12  
13 390 conservative given the outcome is clinical and of low prevalence, both of which are factors  
14  
15 391 associated with low ICC [35, 36]. However, even varying these factors up to an ICC of 0.07  
16  
17 392 or average cluster size of 29, shows we will have at least 80% power to establish non-  
18  
19 393 inferiority in these situations. Assuming the median recovery time in the abdominal group is  
20  
21 394 between 6 and 9 weeks [37] we will have high levels of power (>90%) to detect reductions of  
22  
23 395 1 week in all cases.  
24  
25  
26  
27

396

### 397 ***Analysis of outcome measures***

30 398 A separate Statistical Analysis Plan will be produced and will provide a more comprehensive  
31  
32 399 description of the planned statistical analyses. For the primary outcome, given the nature of  
33  
34 400 the non-inferiority design, supportive per-protocol and CACE analyses [38] will be  
35  
36 401 considered alongside the intention-to-treat population. All outcomes will be adjusted for the  
37  
38 402 minimisation variables where possible.  
39  
40

403

43 404 For all major outcome measures, summary statistics and differences between groups, e.g.  
44  
45 405 relative risks, will be presented with 95% confidence intervals. For the primary outcome, this  
46  
47 406 is equivalent to a one-sided 97.5% confidence interval and hence conservative in terms of  
48  
49 407 the non-inferiority margin. For the trial to declare non-inferiority of the laparoscopic  
50  
51 408 approach, the lower margin of the absolute risk difference confidence interval must not  
52  
53 409 exceed 3%.  
54  
55

410

1  
2  
3 411 For the key secondary outcome of time from surgery to resumption of usual activities, we will  
4  
5 412 incorporate a conditional hierarchical approach to interpretation of the 95% confidence  
6  
7 413 interval to ensure we appropriately control for the overall rate of type I error [39].  
8

9 414

#### 11 415 *Primary Outcome Measure*

13 416 We will use a mixed effect binomial regression model to estimate the absolute risk difference  
14  
15 417 and 95% confidence interval (primary method). Relative risks will be calculated in a similar  
16  
17 418 fashion. Parameters for treatment group as well as the minimisation variables will be  
18  
19 419 included in the model as fixed effects. We will explore methods to most appropriate account  
20  
21 420 for both centre and surgeon variation; these elements will also be included in the model as  
22  
23 421 random effect.  
24

25 422

#### 28 423 *Secondary Outcome Measures*

30 424 The key secondary outcome of time from surgery to resumption of normal activities will be  
31  
32 425 analysed using a mixed effects ('frailty') Cox Proportional Hazard model [40], allowing the  
33  
34 426 same minimisation variables and incorporating parameters for both centre and surgeon.  
35  
36 427 Linear regression models will be used to analyse response from continuous outcome  
37  
38 428 measures such as, e.g. participant reported questionnaires, duration of surgery and pain via  
39  
40 429 NRS; mean differences and 95% confidence intervals will be produced. Other binary and  
41  
42 430 time-to-event analyses will be considered in the same fashion as the primary and key  
43  
44 431 secondary outcomes. Satisfaction responses will be analysed using ordinal logistic  
45  
46 432 regression. Serious adverse events will be summarised and analysed using a chi-squared  
47  
48 433 test. Analgesia use will be summarised but not formally analysed. Appropriate summary  
49  
50 434 statistics split by group will be presented for each outcome (e.g. proportions/percentages,  
51  
52 435 mean/standard deviation or median/interquartile range).  
53

54 436

#### 58 437 *Subgroup Analyses*

1  
2  
3 438 Subgroup analyses will be limited to the same variables used in the minimisation algorithm,  
4  
5 439 and performed on the primary and key secondary outcomes. Given they will have low power  
6  
7 440 to assess non-inferiority on the primary outcome variable they will be treated as exploratory.  
8  
9 441 Tests for statistical heterogeneity (e.g. by including the treatment group by subgroup  
10  
11 442 interaction parameter in the regression model) will be undertaken.  
12  
13  
14 443

#### 15 444 *Missing Data and Sensitivity Analyses*

17 445 Every attempt will be made to collect full follow-up data on all study participants; it is thus  
18  
19 446 anticipated that missing data will be minimal. Participants with missing primary outcome data  
20  
21 447 will not be included in the primary analysis in the first instance. This presents a risk of bias,  
22  
23 448 and sensitivity analyses will be undertaken to assess the possible impact of the risk.  
24  
25  
26 449

#### 27 450 *Planned Interim Analysis*

28  
29 451 Interim analyses of safety and efficacy for presentation to the independent DMC will take  
30  
31 452 place during the study. The committee will meet prior to study commencement to agree the  
32  
33 453 manner and timing of such analyses but this is likely to include the analysis of the primary  
34  
35 454 and key secondary outcome and full assessment of safety (SAEs) at least at annual  
36  
37 455 intervals. Criteria for stopping or modifying the study based on this information will be ratified  
38  
39 456 by the DMC. Details of the agreed plan will be written into the Statistical Analysis Plan.  
40  
41  
42 457

#### 43 458 *Planned Final Analyses*

44  
45 459 The primary analysis for the study will occur once all participants have completed the  
46  
47 460 assessments at 12 months post-surgery and corresponding outcome data has been entered  
48  
49 461 onto the study database and validated as being ready for analysis. This analysis will include  
50  
51 462 data items up to and including this time-point only. The longer term data collected at 24  
52  
53 463 months and 36 months post-surgery will be restricted to the subgroup of patients who have  
54  
55 464 reached these assessment points prior to study close and reported at a later date (see Trial  
56  
57 465 Schema) (Figure 2)  
58  
59  
60

1  
2  
3 4664  
5 467 **Sub-studies**6  
7  
8 468 Full details of these sub-studies are available from the authors on request9  
10  
11 469 *Qualitative process evaluation*12  
13  
14 470 A qualitative process evaluation was undertaken in parallel to the pilot phase. The primary  
15  
16 471 aim of the qualitative study was to explore the feasibility, acceptability and appropriateness  
17  
18 472 of the trial and intervention for women and healthcare professionals (HCPs). The results  
19  
20 473 were to inform decision-making around progression to a full trial, including study design and  
21  
22 474 processes.23  
24  
25 47526  
27  
28 476 *Health economic evaluation*29  
30 477 An economic evaluation was designed to assess the cost-effectiveness of laparoscopic  
31  
32 478 hysterectomy compared to open abdominal hysterectomy in the management of benign  
33  
34 479 gynaecological conditions. A within trial-based economic evaluation was to explore the cost-  
35  
36 480 effectiveness of laparoscopic hysterectomy compared to open abdominal hysterectomy. The  
37  
38 481 principal outcomes for the economic evaluation was cost per QALY at 12 months post-  
39  
40 482 surgery. A secondary analyses was planned  
41  
42 483 to generate costs per major surgical complication avoided and costs per return to normal  
43  
44 484 activities.45  
46  
47 48548  
49 48650  
51 487 **Discussion**52  
53  
54 488 The LAVA trial protocol was designed in 2019 and amended during 2020 before funding and  
55  
56 489 ethical approval was granted. The trial commenced recruitment in September 2021 but failed  
57  
58 490 to meet its RAG ('red; amber; green) criteria for site set up and recruitment rate and so for  
59  
60

1  
2  
3 491 this reason and the recognition by the funder (The NIHR HTA Programme) of insufficient  
4  
5 492 NHS clinical and Research & Development capacity post the Covid-19 pandemic, the trial  
6  
7 493 was closed. The research question remains relevant, given that almost 30,000  
8  
9 494 hysterectomies are undertaken per year [7,18] and especially now that the laparoscopic  
10  
11 495 approach to hysterectomy is being facilitated further by advances in instrumentation  
12  
13 496 including robotic surgery [41,42]. Our research group plans to analyse qualitative and  
14  
15 497 quantitative data acquired from the commencement of the trial to inform future surgical trials  
16  
17 498 and aid future researchers wishing to undertake comparative trials in hysterectomy. We  
18  
19 499 believe that our carefully considered protocol will be of value to future researchers working in  
20  
21  
22 500 the field of optimising clinical outcomes for women undergoing hysterectomy.  
23  
24  
25 501

26  
27  
28 502

### ***Strengths and limitations***

29  
30 503 The LAVA trial was larger than all the previous 25 RCTs evaluating laparoscopic and open  
31  
32 504 hysterectomy and of higher quality, addressing the methodological deficiencies of previous  
33  
34 505 trials; namely their power to show a meaningful difference, the validity of outcomes  
35  
36 506 assessment, especially the key outcome of recovery and a failure to account for surgical  
37  
38 507 expertise. In the LAVA trial we used a novel, validated, personalised recovery tool  
39  
40 508 [17,21,22], and employed an expertise-based design to mitigate against surgical expertise  
41  
42 509 bias [19,34]. Third part randomisation was performed balancing important prognostic  
43  
44 510 variables. Due to the differing natures of the intervention it is impossible to blind either the  
45  
46 511 care providers, investigators or participants to their allocated group.  
47  
48  
49  
50 512

51  
52  
53 513

### ***Potential impact and implications***

54  
55  
56 514 Hysterectomy is common, with one in ten women undergoing the procedure in their lifetime,  
57  
58 515 mostly for  
59  
60



1  
2  
3 516 benign conditions [12,13,14]. The operation imposes substantial morbidity upon women,  
4  
5 517 disrupts families and impacts upon wider society through utilisation of scarce health care  
6  
7 518 resources and lost productivity [3,4,5,6] [15]. These burdens could potentially be reduced  
8  
9 519 with safe, less invasive surgery allowing quicker recovery. Currently, most hysterectomies  
10  
11 520 are performed abdominally because this traditional method is thought to minimise intra-  
12  
13 521 operative complications but the increased trauma of an abdominal incision can prolong  
14  
15 522 recovery [2]. This may be especially true in overweight and obese women, where morbidity  
16  
17 523 is greater from mobility restrictions and wound infection [16].  
18  
19

20 524  
21  
22 525 Laparoscopic hysterectomy avoids the need for a large surgical incision speeding recovery  
23  
24 526 for most women but has been associated with serious complications and specialist surgical  
25  
26 527 skills. However, scientific advances in imaging and equipment, has made laparoscopic  
27  
28 528 surgery easier as well as more accessible to general gynaecologists [11] [17,18].  
29  
30 529 Furthermore, laparoscopic surgery forms an integral part of modern packages of nursing,  
31  
32 530 anaesthetic and surgical care designed to enhance recovery and allow 24 hour hospital  
33  
34 531 discharge [20].  
35

36 532  
37  
38  
39 533 The wider adoption of contemporary laparoscopic hysterectomy has the potential to  
40  
41 534 minimise morbidity, expedite recovery and improve clinical outcomes for women in the short-  
42  
43 535 term and longer-term. Furthermore, enhanced recovery has the potential to be economically  
44  
45 536 advantageous to the NHS through resource efficiencies and wider society via increased  
46  
47 537 productivity.  
48

49 538  
50

### 51 52 539 ***Ethics and dissemination*** 53

54  
55 540 The study was approved by the West Midlands-Edgbaston Research Ethics Committee. All  
56  
57 541 participants gave informed consent before participation. The trial was being conducted in  
58  
59 542 accordance with the Research Governance Framework for Health and Social Care, the  
60

1  
2  
3 543 applicable UK Statutory Instruments, (which include the Data Protection Act 1998) and the  
4  
5 544 Principles of GCP. The protocol will be submitted to and approved by the main REC prior to  
6  
7 545 circulation.  
8

9 546

10  
11 547 The findings will be presented and disseminated via the BSGE, RCOG and other national  
12  
13 548 and international conferences. We will also aim to publish the findings in high impact peer  
14  
15 549 reviewed journals. We will disseminate the completed paper to the Department of Health,  
16  
17 550 the Scientific Advisory Committees of the RCOG, the Royal College of Nurses (RCN) and  
18  
19 551 the BSGE.  
20  
21

22 552

### 23 24 25 553 **Acknowledgments**

26  
27 554 The authors thank Dr Zeyah Sairally, and Dr Lynsey Matthews for their help in the LAVA  
28  
29 555 trial.  
30

31 556

### 32 33 34 557 **Statements**

35  
36  
37 558 **Author's contribution:** TJC, LM, PB, JF, MM, KC, ES, LJ, PS, TR, WM were involved in  
38  
39  
40 559 conception and trial design. TJC, LA and were involved in drafting of the article. TJC  
41  
42 560 reviewed and critiqued the article for intellectual content. All the authors were involved in  
43  
44 561 final approval of the article.  
45

46 562

47  
48 563 **Funding statement:** Funding for the LAVA trial is provided by an award from the National  
49  
50 564 Institute of Health Research Health Technology Assessment program. Ref: NIHR128991.  
51

52  
53 565

54  
55  
56 566 **Competing interests statement:** None declared.  
57

58  
59 567  
60

568

569 **References**

570

571

1. Ruiz de Azua Unzurrunzaga G, Brewster DH, Wild SH, Sivalingam VN. Declining hysterectomy prevalence and the estimated impact on uterine cancer incidence in Scotland. *Cancer Epidemiol* 2019;**59**:227-31.

574

<https://doi.org/10.1016/j.canep.2019.02.008>.

575

576

2. ACOG Committee Opinion No. 444: choosing the route of hysterectomy for benign disease. *Obstet Gynecol* 2009;**114**:1156-8.

577

578

<https://doi.org/10.1097/AOG.0b013e3181c33c72>.

579

580

3. Nieboer TE, Johnson N, Lethaby A, Tavender E, Curr E, Garry R, *et al*. Surgical approach to hysterectomy for benign gynaecological disease. *Cochrane Database Syst Rev* 2009; 10.1002/14651858.CD003677.pub4:CD003677.

582

583

<https://doi.org/10.1002/14651858.CD003677>.

584

585

4. Middleton LJ, Champaneria R, Daniels JP, Bhattacharya S, Cooper KG, Hilken NH, *et al*. Hysterectomy, endometrial destruction, and levonorgestrel releasing intrauterine system (Mirena) for heavy menstrual bleeding: systematic review and meta-analysis of data from individual patients. *BMJ* 2010;**341**:c3929. <https://doi.org/10.1136/bmj.c3929>.

586

587

588

589

590

5. Aarts JW, Nieboer TE, Johnson N, Tavender E, Garry R, Mol BW, *et al*. Surgical approach to hysterectomy for benign gynaecological disease. *Cochrane Database Syst Rev* 2015; 10.1002/14651858.CD003677.pub5:CD003677.

591

592

593

<https://doi.org/10.1002/14651858.CD003677>.

594

- 1  
2  
3 595 6. Royal College of Obstetricians and Gynaecologists LSoHTM, Ipsos MORI. *National*  
4  
5 596 *Heavy Menstrual Bleeding Audit: Final report*. London, UK. RCOG Press; 2014. URL:  
6  
7 597 <https://www.rcog.org.uk/globalassets/documents/guidelines/research-->  
8  
9 598 [audit/national\\_hmb\\_audit\\_final\\_report\\_july\\_2014.pdf](https://www.rcog.org.uk/globalassets/documents/guidelines/research--audit/national_hmb_audit_final_report_july_2014.pdf) (accessed).  
10  
11 599  
12  
13 600 7. Royal College of Obstetricians and Gynaecologists LU. *Patterns of Benign*  
14  
15 601 *Gynaecology Care in English NHS Hospital Trusts 2015/16.*; 2018. URL:  
16  
17 602 <https://www.rcog.org.uk/en/guidelines-research-services/audit-quality->  
18  
19 603 [improvement/clinical-indicators-programme/benign-gynaecological-care/benign-](https://www.rcog.org.uk/en/guidelines-research-services/audit-quality-improvement/clinical-indicators-programme/benign-gynaecological-care/benign-gynaecology-report-2015-16/)  
20  
21 604 [gynaecology-report-2015-16/](https://www.rcog.org.uk/en/guidelines-research-services/audit-quality-improvement/clinical-indicators-programme/benign-gynaecological-care/benign-gynaecology-report-2015-16/) (accessed).  
22  
23 605  
24  
25 606 8. Liu Z, Doan QV, Blumenthal P, Dubois RW. A systematic review evaluating health-  
26  
27 607 related quality of life, work impairment, and health-care costs and utilization in abnormal  
28  
29 608 uterine bleeding. *Value Health* 2007;**10**:183-94. <https://doi.org/10.1111/j.1524->  
30  
31 609 [4733.2007.00168.](https://doi.org/10.1111/j.1524-4733.2007.00168.)  
32  
33 610  
34  
35 611 9. Frick KD, Clark MA, Steinwachs DM, Langenberg P, Stovall D, Munro MG, *et al.*  
36  
37 612 Financial and quality-of-life burden of dysfunctional uterine bleeding among women  
38  
39 613 agreeing to obtain surgical treatment. *Womens Health Issues* 2009;**19**:70-8.  
40  
41 614 <https://doi.org/10.1016/j.whi.2008.07.002>  
42  
43 615  
44  
45 616 10. Blikkendaal MD, Schepers EM, van Zwet EW, Twijnstra AR, Jansen FW. Hysterectomy  
46  
47 617 in in very obese and morbidly obese patients: a systematic review with cumulative  
48  
49 618 analysis of comparative studies. *Arch Gynecol Obstet* 2015;**292**:723-38.  
50  
51 619 <https://doi.org/10.1007/s00404-015-3680-7>  
52  
53 620  
54  
55  
56  
57  
58  
59  
60

- 1  
2  
3 621 11. Garry R, Fountain J, Mason S, Hawe J, Napp V, Abbott J, *et al.* The eVALuate study:  
4  
5 622 two parallel randomised trials, one comparing laparoscopic with abdominal  
6  
7 623 hysterectomy, the other comparing laparoscopic with vaginal hysterectomy. *BMJ*  
8  
9 624 2004;**328**:129. <https://doi.org/10.1136/bmj.37984.623889.F6>.
- 11  
12 625 12. Ghezzi F, Uccella S, Cromi A, Siesto G, Serati M, Bogani G, *et al.* Postoperative pain  
13  
14 626 after laparoscopic and vaginal hysterectomy for benign gynecologic disease: a  
15  
16 627 randomized trial. *Am J Obstet Gynecol* 2010;**203**:118 e1-8.  
17  
18 628 <https://doi.org/10.1016/j.ajog.2010.04.026>.
- 20  
21 629  
22  
23 630 13. Song T, Cho J, Kim TJ, Kim IR, Hahm TS, Kim BG, *et al.* Cosmetic outcomes of  
24  
25 631 laparoendoscopic single-site hysterectomy compared with multi-port surgery:  
26  
27 632 randomized controlled trial. *J Minim Invasive Gynecol* 2013;**20**:460-7.  
28  
29 633 <https://doi.org/10.1016/j.jmig.2013.01.010>.
- 31  
32 634  
33  
34 635 14. Paraiso MF, Ridgeway B, Park AJ, Jelovsek JE, Barber MD, Falcone T, *et al.* A  
35  
36 636 randomized trial comparing conventional and robotically assisted total laparoscopic  
37  
38 637 hysterectomy. *Am J Obstet Gynecol* 2013;**208**:368 e1-7.  
39  
40 638 <https://doi.org/10.1016/j.ajog.2013.02.008>.
- 42  
43 639  
44  
45 640 15. Janssen MF, Bonsel GJ, Luo N. Is EQ-5D-5L Better Than EQ-5D-3L? A Head-to-Head  
46  
47 641 Comparison of Descriptive Systems and Value Sets from Seven Countries.  
48  
49 642 *Pharmacoeconomics* 2018;**36**:675-97. <https://doi.org/10.1007/s40273-018-0623-8>.
- 51  
52 643  
53  
54 644 16. Rose M, Bjorner JB, Gandek B, Bruce B, Fries JF, Ware JE, Jr. The PROMIS Physical  
55  
56 645 Function item bank was calibrated to a standardized metric and shown to improve  
57  
58 646 measurement efficiency. *J Clin Epidemiol* 2014;**67**:516-26.  
59  
60 647 <https://doi.org/10.1016/j.jclinepi.2013.10.024>.

- 1  
2  
3 648  
4  
5 649 17. Lee SH, Oh SR, Cho YJ, Han M, Park JW, Kim SJ, *et al.* Comparison of vaginal  
6  
7 650 hysterectomy and laparoscopic hysterectomy: a systematic review and meta-analysis.  
8  
9 651 *BMC Womens Health* 2019;**19**:83. <https://doi.org/10.1186/s12905-019-0784-4>.  
10  
11 652  
12  
13 653 18. Madhvani K, Curnow T, Carpenter T. Route of hysterectomy: a retrospective, cohort  
14  
15 654 study in English NHS Hospitals from 2011 to 2017. *BJOG* 2019;**126**:795-802.  
16  
17 655 <https://doi.org/10.1111/1471-0528.15539>.  
18  
19 656  
20  
21 657 19. Cook JA, Elders A, Boachie C, Bassinga T, Fraser C, Altman DG, *et al.* A systematic  
22  
23 658 review of the use of an expertise-based randomised controlled trial design. *Trials*  
24  
25 659 2015;**16**:241. <https://doi.org/10.1186/s13063-015-0739-5>.  
26  
27 660  
28  
29 661 20. Barber EL, Van Le L. Enhanced Recovery Pathways in Gynecology and Gynecologic  
30  
31 662 Oncology. *Obstet Gynecol Surv* 2015;**70**:780-92. <https://doi.org/10.1097/OGX>.  
32  
33 663  
34  
35 664 21. Crins MHP, Terwee CB, Klausch T, Smits N, de Vet HCW, Westhovens R, *et al.* The  
36  
37 665 Dutch-Flemish PROMIS Physical Function item bank exhibited strong psychometric  
38  
39 666 properties in patients with chronic pain. *J Clin Epidemiol* 2017;**87**:47-58.  
40  
41 667 <https://doi.org/10.1016/j.jclinepi.2017.03.011>.  
42  
43 668  
44  
45 669 22. Terwee CB, Roorda LD, de Vet HC, Dekker J, Westhovens R, van Leeuwen J, *et al.*  
46  
47 670 Dutch-Flemish translation of 17 item banks from the patient-reported outcomes  
48  
49 671 measurement information system (PROMIS). *Qual Life Res* 2014;**23**:1733-41.  
50  
51 672 <https://doi.org/10.1007/s11136-013-0611-6>.  
52  
53 673  
54  
55 674 23. Van der Meij E, Anema JR, Leclercq WKG, Bongers MY, Consten ECJ, Schraffordt  
56  
57 675 Koops SE, *et al.* Personalised perioperative care by e-health after intermediate-grade

- 1  
2  
3 676 abdominal surgery: a multicentre, single-blind, randomised, placebo-controlled trial.  
4  
5 677 *Lancet* 2018;**392**:51-9. [https://doi.org/10.1016/S0140-6736\(18\)31113-9](https://doi.org/10.1016/S0140-6736(18)31113-9).  
6  
7 678  
8  
9 679 24. Dindo D, Demartines N, Clavien PA. Classification of surgical complications: a new  
10  
11 680 proposal with evaluation in a cohort of 6336 patients and results of a survey. *Ann Surg*  
12  
13 681 2004;**240**:205-13. <https://doi.org/10.1097/01>.  
14  
15 682  
16  
17 683 25. Stark PA, Myles PS, Burke JA. Development and psychometric evaluation of a  
18  
19 684 postoperative quality of recovery score: the QoR-15. *Anesthesiology* 2013;**118**:1332-40.  
20  
21 <https://doi.org/10.1097/ALN.0b013e318289b84b>.  
22  
23 685  
24 686  
25  
26 687 26. EuroQol--a new facility for the measurement of health-related quality of life. *Health*  
27  
28 688 *Policy* 1990;**16**:199-208. [https://doi.org/10.1016/0168-8510\(90\)90421-9](https://doi.org/10.1016/0168-8510(90)90421-9).  
29  
30 689  
31  
32 690 27. Reilly MC, Zbrozek AS, Dukes EM. The validity and reproducibility of a work productivity  
33  
34 691 and activity impairment instrument. *Pharmacoeconomics* 1993;**4**:353-65.  
35  
36 692 <https://doi.org/10.2165/00019053-199304050-00006>.  
37  
38 693  
39  
40 694 28. Hagen S, Glazener C, Sinclair L, Stark D, Bugge C. Psychometric properties of the  
41  
42 695 pelvic organ prolapse symptom score. *BJOG* 2009;**116**:25-31.  
43  
44 696 <https://doi.org/10.1111/j.1471-0528.2008.01903.x>.  
45  
46 697  
47  
48 698 29. Groenendijk AG, Birnie E, Roovers JP, Bonsel GJ. Contribution of primary pelvic organ  
49  
50 699 prolapse to micturition and defecation symptoms. *Obstet Gynecol Int*  
51  
52 700 2012;**2012**:798035.  
53  
54 701  
55  
56 702 30. Uebersax JS, Wyman JF, Shumaker SA, McClish DK, Fantl JA. Short forms to assess  
57  
58 703 life quality and symptom distress for urinary incontinence in women: The Incontinence  
59  
60

- 1  
2  
3 704 Impact Questionnaire and the Urogenital Distress Inventory. Continence Program for  
4  
5 705 Women Research Group. *Neurourol Urodyn* 1995;**14**:131-9.  
6  
7 706 <https://doi.org/10.1002/nau.1930140206>.  
8  
9 707  
10  
11 708 31. Van Brummen HJ, Bruinse HW, van de Pol G, Heintz AP, van der Vaart CH. Defecatory  
12  
13 709 symptoms during and after the first pregnancy: prevalences and associated factors. *Int*  
14  
15 710 *Urogynecol J Pelvic Floor Dysfunct* 2006;**17**:224-30. <https://doi.org/10.1007/s00192->  
16  
17 711 [005-1351-0](https://doi.org/10.1007/s00192-005-1351-0).  
18  
19 712  
20  
21  
22 713 32. Thirlaway K, Fallowfield L, Cuzick J. The Sexual Activity Questionnaire: a measure of  
23  
24 714 women's sexual functioning. *Qual Life Res* 1996;**5**:81-90.  
25  
26 715 <https://doi.org/10.1007/BF00435972>.  
27  
28 716  
29  
30 717 33. Hopwood P, Fletcher I, Lee A, Al Ghazal S. A body image scale for use with cancer  
31  
32 718 patients. *Eur J Cancer* 2001;**37**:189-97. [https://doi.org/10.1016/s0959-8049\(00\)00353-](https://doi.org/10.1016/s0959-8049(00)00353-)  
33  
34 719 [1](https://doi.org/10.1016/s0959-8049(00)00353-1).  
35  
36 720  
37  
38  
39 721 34. Roberts C. The implications of variation in outcome between health professionals for  
40  
41 722 the design and analysis of randomized controlled trials. *Stat Med* 1999;**18**:2605-15.  
42  
43 723 [https://doi.org/10.1002/\(sici\)1097-0258\(19991015\)18:19<2605::aid-sim237>3.0.co;2-n](https://doi.org/10.1002/(sici)1097-0258(19991015)18:19<2605::aid-sim237>3.0.co;2-n).  
44  
45 724  
46  
47 725 35. Gulliford MC, Adams G, Ukoumunne OC, Latinovic R, Chinn S, Campbell MJ. Intraclass  
48  
49 726 correlation coefficient and outcome prevalence are associated in clustered binary data.  
50  
51 727 *J Clin Epidemiol* 2005;**58**:246-51. <https://doi.org/10.1016/j.jclinepi.2004.08.012>.  
52  
53 728  
54  
55 729 36. Pagel C, Prost A, Lewycka S, Das S, Colbourn T, Mahapatra R, *et al*. Intraclass  
56  
57 730 correlation coefficients and coefficients of variation for perinatal outcomes from five  
58  
59 731 cluster-randomised controlled trials in low and middle-income countries: results and



- 1  
2  
3 732 methodological implications. *Trials* 2011;**12**:151. <https://doi.org/10.1186/1745-6215-12->  
4  
5 733 151.  
6  
7 734  
8  
9 735 37. Vonk Noordegraaf A, Anema JR, Louwense MD, Heymans MW, van Mechelen W,  
10  
11 736 Brolmann HA, *et al.* Prediction of time to return to work after gynaecological surgery: a  
12  
13 737 prospective cohort study in the Netherlands. *BJOG* 2014;**121**:487-97.  
14  
15 738 <https://doi.org/10.1111/1471-0528.12494>.  
16  
17 739  
18  
19 740 38. Hewitt CE, Torgerson DJ, Miles JN. Is there another way to take account of  
20  
21 741 noncompliance in randomized controlled trials? *CMAJ* 2006;**175**:347.  
22  
23 742 <https://doi.org/10.1503/cmaj.051625>.  
24  
25 743  
26  
27 744 39. Huque MFD, A. ; D'Agostino, R. Multiplicity Issues in Clinical Trials With Multiple  
28  
29 745 Objectives. *Statistics in Biopharmaceutical Research* 2013;**5**.  
30  
31 746  
32  
33 747 40. Austin PC. A Tutorial on Multilevel Survival Analysis: Methods, Models and  
34  
35 748 Applications. *Int Stat Rev* 2017;**85**:185-203. <https://doi.org/10.1111/insr.12214>.  
36  
37 749  
38  
39 750 41. Gitas G, Hanker L, Rody A, Ackermann J, Alkatout I. Robotic surgery in gynecology: is  
40  
41 751 the future already here? *Minim Invasive Ther Allied Technol.* 2022 Aug;**31**(6):815-824.  
42  
43 752 doi: 10.1080/13645706.2021.2010763.  
44  
45 753  
46  
47 754 42. Totaro A, Campetella M, Bientinesi R, Gandi C, Palermo G, Russo A, Aceto P, Bassi P,  
48  
49 755 Sacco E. The new surgical robotic platform HUGO™ RAS: System description and  
50  
51 756 docking settings for robot-assisted radical prostatectomy. *Urologia.* 2022  
52  
53 757 Nov;**89**(4):603-609. doi: 10.1177/03915603221107855.  
54  
55 758  
56  
57  
58  
59  
60

1  
2  
3 759  
4  
5 760  
6  
7  
8 761  
9  
10  
11 762  
12  
13  
14  
15  
16  
17  
18  
19  
20  
21  
22  
23  
24  
25  
26  
27  
28  
29  
30  
31  
32  
33  
34  
35  
36  
37  
38  
39  
40  
41  
42  
43  
44  
45  
46  
47  
48  
49  
50  
51  
52  
53  
54  
55  
56  
57  
58  
59  
60

For peer review only

1  
2  
3  
4  
5  
6  
7  
8  
9  
10  
11  
12  
13  
14  
15  
16  
17  
18  
19  
20  
21  
22  
23  
24  
25  
26  
27  
28  
29  
30  
31  
32  
33  
34  
35  
36  
37  
38  
39  
40  
41  
42  
43  
44  
45  
46  
47  
48  
49  
50  
51  
52  
53  
54  
55  
56  
57  
58  
59  
60

763

For peer review only

**Figure 1**

The expertise design process for eligible centres

**Confirm eligibility of participating centre**

Members of the Local Surgical Unit (LSU)<sup>1</sup> should:

- (1) Be able to provide laparoscopic AND open hysterectomy for benign conditions by surgeons who meet the threshold for expertise<sup>2</sup>
- (2) Have at least one surgeon willing to randomise to LAVA
- (3) Be able to agree local eligibility criteria (i.e. criteria to undertake either laparoscopic OR open hysterectomy)

**Identify and confirm surgical expertise<sup>2</sup> within the participating centre**

- Expert surgeon LAPAROSCOPIC
- Expert surgeon OPEN

**Randomisation by local research team**

Eligibility confirmed by a surgeon willing to randomise to LAVA<sup>3</sup>

**Laparoscopic hysterectomy**  
Allocated LAPAROSCOPIC expert surgeon<sup>4</sup>

**Open hysterectomy**  
Allocated OPEN expert surgeon<sup>4</sup>

1 Collective group of surgeons within a centre willing to operate on patients recruited into the LAVA trial. Not all surgeons within the LSU need to be willing to randomise but they should be prepared to perform a hysterectomy, according to their expertise, on patients following randomisation.

2 Surgeons to have performed a minimum of 30 cases and to have a current caseload of at least 12 cases per year. For surgeons to conduct both procedures, these criteria will need to be met for both types of hysterectomy. In light of the unprecedented restrictions on elective operating for benign conditions imposed by the Covid-19 pandemic, the required surgical caseload can be determined from the year preceding the SARS-COV-2 viral outbreak in March 2020.

3 The surgeon must consider the position for each individual patient. Only if they believe that either operation will be suitable for an individual patient can the patient then be recruited.

4 Participants must be made aware that their surgery may be conducted by another surgeon within the LSU with the appropriate expertise.

**Figure 2**  
Trial schema

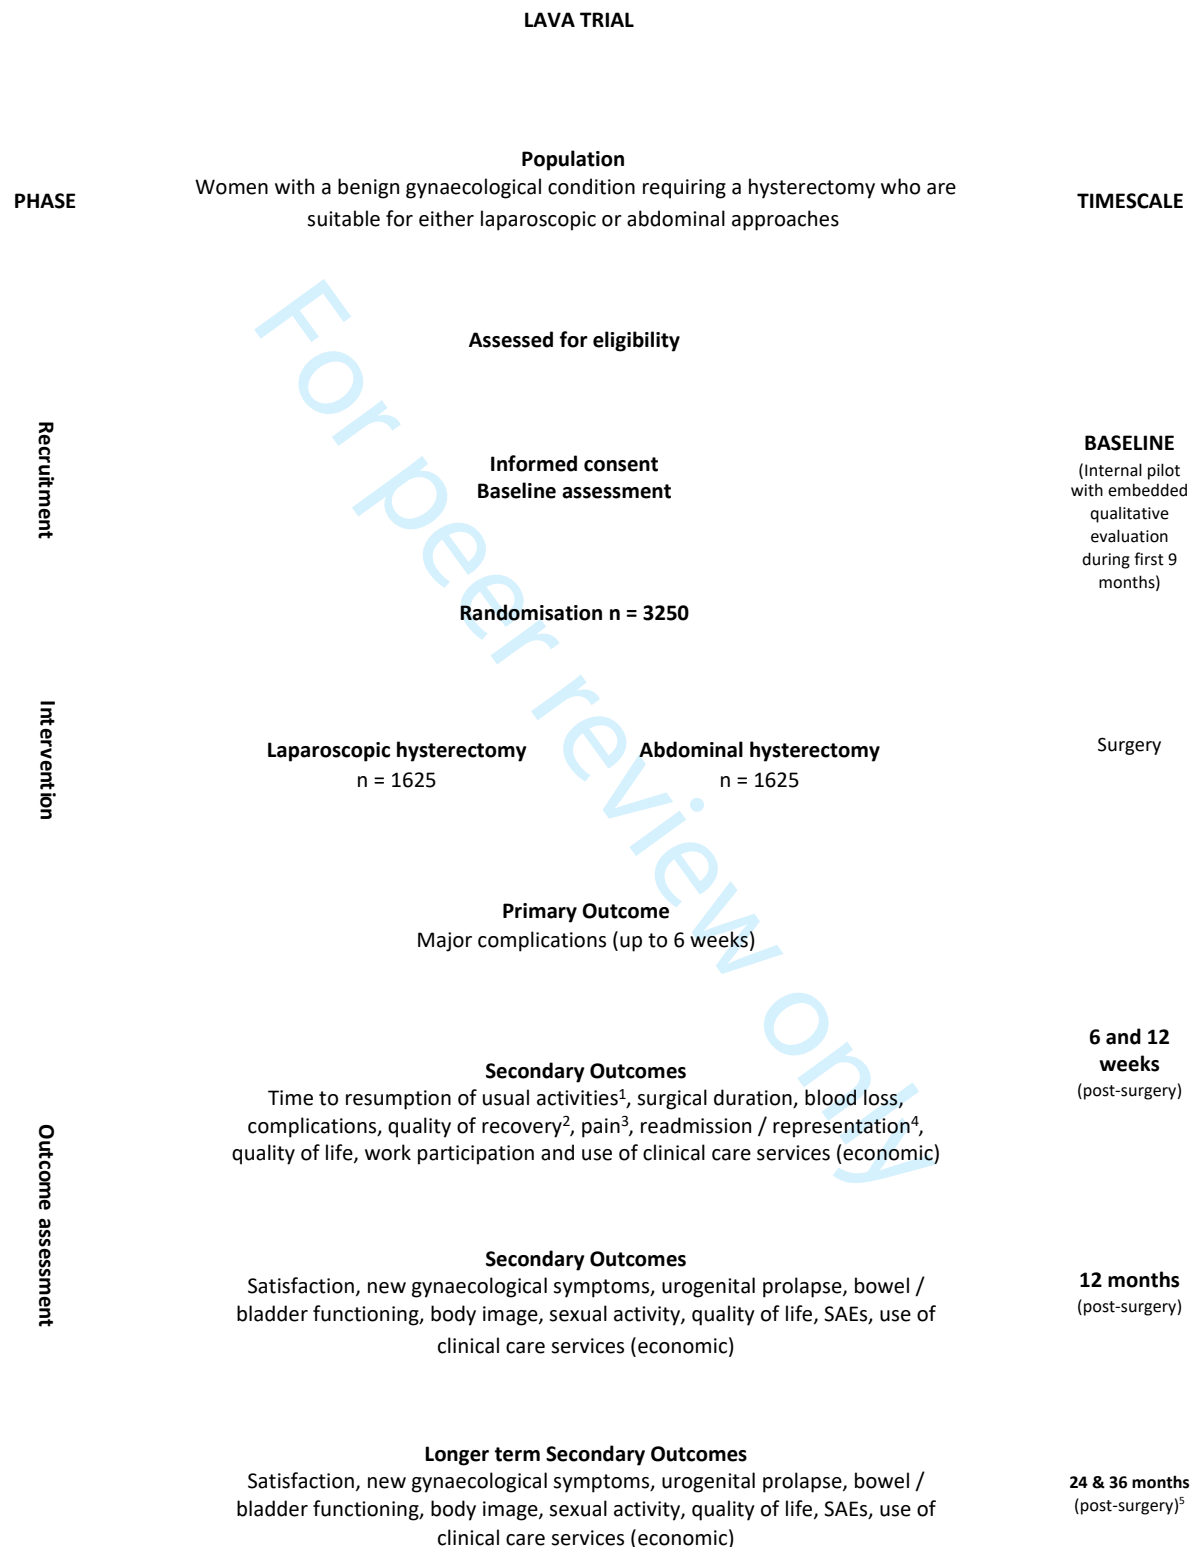

<sup>1</sup> Time from surgery to resumption of usual activities will continue to be evaluated until all 8 selected activities have been resumed

<sup>2</sup> 24 hours post-surgery

<sup>3</sup> Daily, up to and including 14 days post-surgery

<sup>4</sup> 6 weeks post-surgery only

<sup>5</sup> Restricted to subgroups of participants reaching these timepoints prior to close of the study i.e. when the last randomised patient reaches 12 months post-surgery

# BMJ Open

## Laparoscopic Versus Abdominal hysterectomy (LAVA): Protocol of a randomised controlled trial

|                                 |                                                                                                                                                                                                                                                                                                                                                                                                                                                                                                                                                                                                                                                                                                                                                                                                                                                                                                                                                                                            |
|---------------------------------|--------------------------------------------------------------------------------------------------------------------------------------------------------------------------------------------------------------------------------------------------------------------------------------------------------------------------------------------------------------------------------------------------------------------------------------------------------------------------------------------------------------------------------------------------------------------------------------------------------------------------------------------------------------------------------------------------------------------------------------------------------------------------------------------------------------------------------------------------------------------------------------------------------------------------------------------------------------------------------------------|
| Journal:                        | <i>BMJ Open</i>                                                                                                                                                                                                                                                                                                                                                                                                                                                                                                                                                                                                                                                                                                                                                                                                                                                                                                                                                                            |
| Manuscript ID                   | bmjopen-2022-070218.R1                                                                                                                                                                                                                                                                                                                                                                                                                                                                                                                                                                                                                                                                                                                                                                                                                                                                                                                                                                     |
| Article Type:                   | Protocol                                                                                                                                                                                                                                                                                                                                                                                                                                                                                                                                                                                                                                                                                                                                                                                                                                                                                                                                                                                   |
| Date Submitted by the Author:   | 20-Mar-2023                                                                                                                                                                                                                                                                                                                                                                                                                                                                                                                                                                                                                                                                                                                                                                                                                                                                                                                                                                                |
| Complete List of Authors:       | Antoun, Lina; Birmingham Women's and Children's Hospitals NHS Foundation Trust; University of Birmingham<br>Middleton, Lee; University of Birmingham, School of Health and Population Sciences<br>Smith, Paul; Birmingham Women's and Children's NHS Foundation Trust<br>Saridogan, Ertan; University College London Hospitals, Gynaecology<br>Cooper, Kevin; Aberdeen Royal Infirmary; University of Aberdeen<br>Brocklehurst, Peter; University of Birmingham<br>McKinnon, William; University of Birmingham<br>Bevan, Sheriden; University of Birmingham<br>Woolley, Rebecca; University of Birmingham, Birmingham Clinical Trials Unit<br>Jones, Laura; University of Birmingham, Public Health, Epidemiology & Biostatistics<br>Fullard, Jayne; University of Birmingham<br>Morgan, Monique; University of Birmingham<br>Roberts, Tracy; University of Birmingham, Health Economics Unit<br>Clark, T; Birmingham Women's NHS Foundation Trust, Gynaecology; University of Birmingham, |
| <b>Primary Subject Heading</b>: | Obstetrics and gynaecology                                                                                                                                                                                                                                                                                                                                                                                                                                                                                                                                                                                                                                                                                                                                                                                                                                                                                                                                                                 |
| Secondary Subject Heading:      | Obstetrics and gynaecology                                                                                                                                                                                                                                                                                                                                                                                                                                                                                                                                                                                                                                                                                                                                                                                                                                                                                                                                                                 |
| Keywords:                       | Minimally invasive surgery < GYNAECOLOGY, GYNAECOLOGY, Health economics < HEALTH SERVICES ADMINISTRATION & MANAGEMENT                                                                                                                                                                                                                                                                                                                                                                                                                                                                                                                                                                                                                                                                                                                                                                                                                                                                      |
|                                 |                                                                                                                                                                                                                                                                                                                                                                                                                                                                                                                                                                                                                                                                                                                                                                                                                                                                                                                                                                                            |

SCHOLARONE™  
Manuscripts

1  
2  
3 1 **Laparoscopic Versus Abdominal hysterectomy (LAVA): Protocol of a randomised controlled**  
4 **trial**  
5 2  
6  
7  
8 3  
9

10 4 **Lina Antoun**, MD, MRCOG, Specialist Registrar Obstetrics and Gynaecology and Clinical  
11 Research Fellow, Birmingham Women's NHS Foundation Trust, Birmingham, B15 2TG UK  
12  
13 5  
14 and University of Birmingham, B15 2TT UK  
15 6  
16

17  
18 7 **Lee Middleton**, BSc (Hons), MSc, School of Health and Population Sciences, University of  
19 Birmingham, B15 2TT UK  
20 8  
21

22  
23 9 **Paul Smith**, PhD, MRCOG Consultant Obstetrician and Gynaecologist, Birmingham  
24 Women's NHS Foundation Trust, Birmingham, B15 2TG UK  
25 10  
26

27  
28 11 **Ertan Saridogan**, PhD, FRCOG, Consultant Gynaecologist and Professor, University College  
29 London Hospital, London NW1 2PG and University College London Elizabeth Garrett  
30 Anderson Institute for Women's Health, London WC1E 6AU  
31 12  
32 13  
33

34  
35 14 **Kevin Cooper**, MSc, MD, MRCOG, Consultant Gynaecologist and Professor, Aberdeen  
36 Royal Infirmary, NHS Grampian, Aberdeen, AB25 2ZN and University of Aberdeen AB24 3FX  
37 15  
38

39  
40 16 **Peter Brocklehurst**, MBChB, MSc, FRCOG, FFPH, FMedSci, Professor of Women's Health  
41 and Director of Research and Development, Institute of Applied Health Research, University  
42 of Birmingham, Birmingham, B15 2TT, UK  
43 17  
44 18  
45

46  
47 19 **William McKinnon**, Dr, Trials Manager Team Leader, Birmingham Clinical Trial Unit,  
48 University of Birmingham, Birmingham, B15 2TT, UK  
49 20  
50

51  
52 21 **Sheriden Bevan**, Senior Trial Manager, Institute of Applied Health Research, University of  
53 Birmingham, Birmingham, B15 2TT, UK  
54 22  
55

56  
57 23 **Rebecca Woolley**, Miss, Senior Medical Statistician, Birmingham Clinical Trial Unit,  
58 University of Birmingham, Birmingham, B15 2TT, UK  
59 24  
60

1  
2  
3 25 **Laura Jones**, BSc (Hons), DPS, PhD, PCAP, FHEA, Institute of Applied Health Research,  
4  
5 26 University of Birmingham, Birmingham, B15 2TT, UK  
6  
7

8 27 **Jayne Fullard**, Mrs, Patient and Public Involvement, Birmingham  
9

10  
11 28 **Monique Morgan**, Mrs, Patient and Public Involvement, Birmingham  
12

13  
14 29 **Tracy Roberts**, PhD, MPhil(Econ), BSc(Econ)(Hons) RG, Professor of Health Economics and  
15  
16 30 Head of Unit, Institute of Applied Health Research, University of Birmingham, Birmingham,  
17  
18 31 B15 2TT, UK  
19

20  
21 32 **T. Justin Clark**, MD, FRCOG Consultant Gynaecologist and Honorary Professor, Birmingham  
22  
23 33 Women's NHS Foundation Trust, Birmingham, B15 2TG UK and University of Birmingham,  
24  
25 34 Birmingham, B15 2TT UK  
26

27  
28  
29  
30  
31 36 **Address for correspondence:**  
32

33  
34 37 Dr Lina Antoun, Specialist Registrar Obstetrics and Gynaecology and Clinical Research  
35  
36 38 Fellow, Birmingham Women's NHS Foundation Trust, Birmingham, B15 2TG UK and  
37  
38 39 University of Birmingham, B15 2TT UK  
39

40  
41 40 E-mail: antoun.lina@gmail.com  
42

43  
44 41 Tel: 0044 121 607 4712  
45

46  
47  
48  
49  
50 43 **Trial Protocol Version Number: 3.0**  
51

52  
53 44 **Trial Protocol Version Date: 7<sup>th</sup> July 2021**  
54

55  
56 45  
57  
58  
59  
60



1  
2  
3 46 **Abstract**  
4  
5  
6 47  
7  
8  
9 48 Introduction  
10  
11

12 49 There is uncertainty about the advantages and disadvantages of laparoscopic hysterectomy  
13  
14 50 compared with abdominal hysterectomy, particularly the relative rate of complications of the  
15  
16 51 two procedures. Whilst uptake of laparoscopic hysterectomy has been slow, the situation is  
17  
18 52 changing with greater familiarity, better training, better equipment and increased proficiency  
19  
20 53 in the technique. Thus, a large, robust, multi-centre randomised controlled trial (RCT) is  
21  
22 54 needed to compare contemporary laparoscopic hysterectomy with abdominal hysterectomy  
23  
24 55 to determine the safest and most cost-effective technique.  
25  
26

27 56 Methods and analysis  
28  
29

30 57 A parallel, open, non-inferiority, multicentre, randomised controlled, expertise-based surgery  
31  
32 58 trial with integrated health economic evaluation and an internal pilot with an embedded  
33  
34 59 qualitative process evaluation. A within trial-based economic evaluation will explore the cost-  
35  
36 60 effectiveness of laparoscopic hysterectomy compared to open abdominal hysterectomy. We  
37  
38 61 will aim to recruit 3250 women requiring a hysterectomy for a benign gynaecological condition  
39  
40 62 and who were suitable for either laparoscopic or open techniques. The primary outcome is  
41  
42 63 major complications up to six completed weeks post-surgery and the key secondary outcome  
43  
44 64 is time from surgery to resumption of usual activities using the personalised PROMIS-SF  
45  
46 65 (Patient-Reported Outcomes Measurement Information System Physical Function)  
47  
48 66 questionnaire. The principal outcome for the economic evaluation is to be cost per QALY at  
49  
50 67 12 months' post-surgery. A secondary analysis is to be undertaken to generate costs per  
51  
52 68 major surgical complication avoided and costs per return to normal activities.  
53  
54  
55

56 69 Ethics and dissemination  
57  
58  
59  
60

1  
2  
3 70 The study was approved by the West Midlands-Edgbaston Research Ethics Committee, 18th  
4  
5 71 February-2021 (Ethics ref: 21/WM/0019). REC approval for the protocol version 2.0 dated  
6  
7 72 02<sup>nd</sup> February 2021 was issued on 18<sup>th</sup> February 2021.  
8  
9

10 73 We will present the findings in national and international conferences. We will also aim to  
11  
12 74 publish the findings in high impact peer reviewed journals. We will disseminate the completed  
13  
14 75 paper to the Department of Health, the Scientific Advisory Committees of the RCOG, the Royal  
15  
16 76 College of Nurses (RCN) and the BSGE.  
17  
18

19 77 Trial registration  
20  
21

22 78 University of Birmingham, ISRCTN14566195.  
23  
24  
25 79  
26  
27  
28  
29  
30  
31  
32  
33  
34  
35  
36  
37  
38  
39  
40  
41  
42  
43  
44  
45  
46  
47  
48  
49  
50  
51  
52  
53  
54  
55  
56  
57  
58  
59  
60

1  
2  
3 80 **STRENGTHS AND LIMITATIONS OF THIS STUDY**  
4

- 5 81 • The LAVA trial is larger than all the previous 25 RCTs evaluating laparoscopic and  
6  
7 82 open hysterectomy and of higher quality, addressing the methodological deficiencies  
8  
9 83 of previous trials; namely their power to show a meaningful difference, accounting for  
10  
11 84 surgical expertise bias and the ensuring the validity of outcomes assessments,  
12  
13 85 especially the key secondary outcome of personalised recovery  
14  
15  
16 86 • In the LAVA trial a novel, validated, personalised recovery tool is used via SMS and  
17  
18 87 an expertise-based design to mitigate against surgical expertise bias employed.  
19  
20  
21 88 • Third part randomisation is to be performed balancing important prognostic variables.  
22  
23  
24 89 • Due to the differing natures of the intervention it is impossible to blind either the care  
25  
26 90 providers, investigators or participants to their allocated group.  
27  
28  
29  
30 91  
31  
32 92  
33  
34  
35 93  
36  
37  
38  
39  
40  
41  
42  
43  
44  
45  
46  
47  
48  
49  
50  
51  
52  
53  
54  
55  
56  
57  
58  
59  
60

## 1. Introduction

Hysterectomy is common, with one in ten women undergoing the procedure in their lifetime, mostly for benign conditions [1,2,3]. 30,000 women undergo a hysterectomy every year in the UK for benign indications such as abnormal uterine bleeding and pelvic pain [1,2,3].

The procedure is associated with high rates of patient satisfaction and improvement in quality of life (QoL) but serious complications can arise [4,5]. The morbidity arising from hysterectomy imposes a burden on women and the ubiquity of the procedure utilises a substantial amount of scarce health care resources [6,7,8,9]. Currently, most hysterectomies are performed by laparotomy, through a vertical or transverse incision because this traditional method is thought to minimise intra-operative complications but the increased trauma of an abdominal incision can prolong recovery [5]. This may be especially true in overweight and obese women, where morbidity is greater from mobility restrictions and wound infection [10].

Several RCTs, mostly small and of low or moderate quality, have compared the surgical approach to hysterectomy for benign disease. The 2015 Cochrane review identified 25 trials (2983 women) comparing laparoscopic and abdominal hysterectomy [5]. Laparoscopic hysterectomy was found to have significantly more urinary tract injuries (bladder or ureter) but the available evidence was of low quality. The largest RCT included in this review was conducted over 15 years ago, when laparoscopic hysterectomy was in its infancy [11]. Smaller, but more recent trials of laparoscopic hysterectomy, have shown a trend towards a lower major complication rate [12,13,14,15]. The Cochrane review [5] identified no differences in the costs or outcomes apart from return to normal activities, which was shorter in the laparoscopic hysterectomy group by 14 days on average.

1  
2  
3 118 The uptake of laparoscopic hysterectomy is increasing with greater familiarity and increased  
4  
5 119 proficiency in the technique aided by improved training and better surgical equipment [16,  
6  
7 120 17,18]. Patient's values and preferences, especially around speed of recovery may also be  
8  
9  
10 121 driving this trend.

11  
12  
13 122 A systematic review of cost-effectiveness studies of hysterectomy, found laparoscopic  
14  
15 123 hysterectomy to be the least cost-effective but the authors felt that conclusions were difficult  
16  
17 124 to draw due to variation in study design, follow up times, and the QoL measurement used  
18  
19 125 [19,20]. Thus, we designed a large RCT to determine the clinical and cost-effectiveness of  
20  
21 126 laparoscopic hysterectomy compared to open abdominal hysterectomy for women with a  
22  
23 127 benign gynaecological condition.  
24  
25  
26  
27 128  
28  
29  
30 129

## 31 32 130 **2. Aims and objectives**

### 33 34 131 35 132 **2.1. Main clinical objective**

36  
37 133 To compare laparoscopic hysterectomy with open abdominal hysterectomy in terms of  
38  
39 134 major intra-operative and post-operative surgical complications (up to six weeks). Post-  
40  
41 135 operative recovery will also be evaluated by measuring the time from surgery to  
42  
43 136 resumption of usual activities.  
44  
45  
46  
47  
48  
49 137

### 50 51 138 **2.2. Economic objectives**

52  
53  
54 139 To compare the relative cost effectiveness of laparoscopic hysterectomy with open  
55  
56 140 abdominal hysterectomy in terms of cost per quality adjusted life year. Additional cost-  
57  
58  
59  
60

1  
2  
3 141 effectiveness analyses will explore cost per major surgical complication avoided and cost  
4  
5 142 per return to normal activities.  
6  
7

8 143

### 11 144 **3. Study design and setting**

13 145

#### 15 146 **3.1. Trial design**

17  
18 147 The study is designed as a parallel, open, non-inferiority, multicentre, randomised controlled,  
19  
20 148 expertise-based surgery trial with integrated health economic evaluation and an internal pilot  
21  
22 149 with an embedded qualitative process evaluation to assess the ability of the study to recruit  
23  
24 150 and randomise.  
25  
26

27 151

#### 30 152 **3.2. Trial setting**

32  
33 153 Recruitment to the LAVA study will take place in gynaecology departments (general and  
34  
35 154 relevant specialist clinics including menstrual disorders and pelvic pain clinics, hysteroscopy  
36  
37 155 and colposcopy services) in up to 50 NHS Hospitals within the UK.  
38  
39

40 156

#### 43 157 **3.3. Identification of participants**

45  
46 158 Eligible women will be identified by a member of the clinical team responsible for the direct  
47  
48 159 care of the potential participant in outpatient gynaecology clinics and pre-operative  
49  
50 160 assessment clinics in each recruiting centre. The LAVA study will be introduced by a member  
51  
52 161 of the clinical or research team, with full counselling about the trial (including provision of  
53  
54 162 information about the qualitative process evaluation).  
55  
56

57 163

1  
2  
3 164 **3.4. Sub-studies**  
4  
5

6 165 **3.4.1. Qualitative evaluation**  
7  
8

9 166 A qualitative process evaluation will be undertaken in parallel to the pilot phase. The primary  
10 167 aim of the qualitative study is to explore the feasibility, acceptability and appropriateness of  
11 168 the trial and intervention for women and healthcare professionals (HCPs). The results will  
12 169 inform decision-making around progression to a full trial, including study design and  
13 170 processes.  
14  
15  
16  
17  
18  
19

20 171

21  
22  
23 172 **3.4.2. Health Economic evaluation**  
24  
25

26 173 An economic evaluation alongside the RCT will explore the cost-effectiveness of laparoscopic  
27 174 hysterectomy compared to open abdominal hysterectomy based on a primary outcome of  
28 175 quality-adjusted life years and secondary outcomes such as major surgical complications  
29 176 avoided. The analysis will adopt the perspective of the health service. All resource use will be  
30 177 collected prospectively and unit costs attached. Deterministic and probabilistic sensitivity  
31 178 analysis will be carried out.  
32  
33  
34  
35  
36  
37  
38  
39

40 179

41  
42  
43 180 **3.5. Patient and Public Involvement (PPI)**  
44  
45

46 181 Our research has been developed with involvement of members of the RCOG Women's  
47 182 Voices group, the Hysterectomy Association, and the Birmingham Women's Hospital  
48 183 Hysterectomy Focus Group. A total of 945 women responded to our PPI survey. Major  
49 184 complications were ranked as the most important outcome for the trial to assess, with return  
50 185 to usual activities considered the second most important outcome (ranked in the top three  
51 186 most important outcomes in the BSGE survey). A measure of the speed and quality of  
52  
53  
54  
55  
56  
57  
58  
59  
60

1  
2  
3 187 recovery was also considered one of the most important outcomes to measure after major  
4  
5 188 complications and improvement in QoL in the PPI survey.  
6  
7

8 189 Two focus groups felt the burden placed upon women from administering outcome  
9  
10 190 questionnaires at 24 hours' post-surgery and the frequency of dissemination post- operatively  
11  
12 191 proposed was acceptable. Indeed, the consensus view was that measuring recovery against  
13  
14 192 pre-set targets was a good thing (with tools already available on the internet). This frequency  
15  
16 193 of contact was also supported by the PPI survey; 6 weeks 485/945 (51%) and 12 months  
17  
18 194 514/945 (54%) were the most popular time points.  
19  
20

21 195 Overall almost 50% (462/945) of PPI survey respondents were willing to consider taking part  
22  
23 196 in the proposed trial. Excluding the 483 women declining to participate because they had  
24  
25 197 already undergone a hysterectomy revealed that 63% (292/462) of respondents were willing  
26  
27 198 to take part, with the remainder being "not sure".  
28  
29

30  
31 199 Results of the study will be shared with study participants, staff members at research sites  
32  
33 200 and investigators of other studies related to hysterectomy and benign gynaecological surgery.  
34  
35 201 A formal notification to the ethics committee, Department of Health, key partners and sponsors  
36  
37 202 will be made. Outreach to other key stakeholders (trial networks, health advocates) involved  
38  
39 203 in related trials is planned. The trial team has key individuals to optimise the dissemination of  
40  
41 204 results. With our PPI co-applicants and contacts we will produce effective, contemporary  
42  
43 205 formats for dissemination e.g. the use of video podcasts and social media outlets.  
44  
45

46 206  
47  
48

49 207  
50  
51

#### 52 208 **4. Participants**

53  
54 209

55  
56  
57 210 Women are eligible for recruitment to the LAVA trial if they meet the following inclusion criteria  
58  
59 211 and do not have any of the exclusion criteria set out below:  
60



1  
2  
3 212 *Inclusion Criteria*  
4  
5

- 6 213 • Aged between 18-55 years of age and able to give informed consent to participate  
7  
8  
9 214 • Have a benign gynaecological condition that is being treated with a hysterectomy  
10  
11 215 • This hysterectomy can be undertaken by either a laparoscopic or open abdominal  
12  
13 216 routes. The feasibility, and appropriateness of both routes of hysterectomy for  
14  
15 217 women were to be decided pragmatically, the operating surgeon deciding where their  
16  
17 218 equipoise was taking into consideration factors such as the size of the uterus,  
18  
19 219 likelihood of pelvic adhesions and anticipated surgical complexity for either approach.  
20  
21

22 220 *Exclusion Criteria*  
23  
24

- 25 221 • Women with suspected malignant disease of the genital tract  
26  
27 222 • Women who require concomitant gynaecological surgery for bladder or other pelvic  
28  
29 223 support  
30  
31 224 • Women who require concomitant gynaecological surgery for excision of deep  
32  
33 225 endometriosis that requires dissection of the para-rectal space  
34  
35  
36 226  
37  
38

39 227 **4.1. Choice of intervention**  
40  
41

42 228 The LAVA trial will compare laparoscopic with conventional abdominal hysterectomy. Vaginal  
43  
44 229 hysterectomy has been shown to be beneficial in terms of complications and recovery but this  
45  
46 230 technique is largely confined to women with prolapse and where the uterus is not enlarged  
47  
48 231 [16]. Whilst the uptake of laparoscopic hysterectomy has been slow [17], the situation is  
49  
50 232 changing with greater familiarity, better training, better equipment and increased proficiency  
51  
52 233 in the technique, such that nearly as many hysterectomies for benign disease are now being  
53  
54 234 done laparoscopically as abdominally [18,19].  
55  
56  
57  
58 235  
59  
60

1  
2  
3 236 Contemporary gynaecological practice has developed rapidly in response to technological  
4  
5 237 advances facilitating less invasive surgical techniques for common operations aligned with  
6  
7 238 innovations in pre, peri- and post-operative care designed to 'enhance' recovery [20]. The  
8  
9 239 results of this trial will have a significant impact on day-to-day clinical practice in women's  
10  
11 240 health care.

12 241

13 242

## 14 243 **5. Consent**

15 244

16 245 It will be the responsibility of the Investigator to obtain informed consent (paper or  
17 246 electronic) for each participant prior to performing any trial related procedure  
18 247 (Supplementary file). A research nurse, research midwife or clinician is able to take  
19 248 consent providing that local practice allows this and responsibility has been delegated by  
20 249 the Principal Investigator as captured on the Site Signature and Delegation Log.

21 250

22 251

## 23 252 **6. Recruitment, enrolment and randomisation**

24 253

### 25 254 **6.1. Recruitment**

26 255 Potential participants will be identified and approached by medical staff who are responsible  
27 256 for the direct care of the potential participant in participating centres after having received  
28 257 appropriate training relating to the trial and who are delegated this task on the site  
29 258 delegation log. Recruitment will take place in gynaecology clinics in gynaecologist lead  
30 259 centres located across the United Kingdom. Research Ethics Committee (REC) approved

1  
2  
3 260 posters making potential participants aware of the study may be displayed in areas that will  
4  
5 261 be accessed by them, such as waiting areas, clinics and consulting rooms  
6

7 262

## 9 263 **6.2. Enrolment**

11  
12 264 Women with benign gynaecological conditions requiring a hysterectomy and who are suitable  
13  
14 265 for either surgical technique are eligible for inclusion in the LAVA trial.  
15

16  
17 266 Prior to clinical consultations, the medical records of potential participants may be screened  
18  
19 267 for eligibility by clinic doctors, nurses, and research nurses, after having received appropriate  
20  
21 268 training relating to the trial.  
22

23  
24 269 Potential participants will be provided with a REC approved Study Participant Information  
25  
26 270 Sheet (PIS) and given time to consider their involvement. Clinic doctors will confirm eligibility  
27  
28 271 for the trial. After participant eligibility is confirmed and informed consent received, the  
29  
30 272 baseline questionnaires are to be completed and then the participant randomised into the trial.  
31  
32 273 Baseline data collected includes demographic and medical data (age ethnicity, BMI ( $\leq 29.9$ ,  
33  
34 274  $30-34.9$ ,  $\geq 35$  Kg/m<sup>2</sup>), previous caesarean section (yes / no), uterine size  $\leq 12$  weeks,  $>12$   
35  
36 275 weeks, planned retention of cervix yes / no); Patient-Reported Outcomes Measurement  
37  
38 276 Information System Physical Function (PROMIS-PF) item bank v1.2 [19] (see "key secondary  
39  
40 277 outcome"); quality of life, symptom and physical functioning questionnaires, EuroQoL EQ-5D-  
41  
42 278 5L and EQ VAS [15], Urogenital Distress Inventory (UDI) [21], Pelvic organ prolapse symptom  
43  
44 279 score (POP-SS) [21], Defecatory Distress Inventory (DDI) [22], Sexual Activity Questionnaire  
45  
46 280 (SAQ) [23].  
47

48  
49  
50 281 Participants should be aware at the beginning that they can freely withdraw (discontinue  
51  
52 282 participation) from the trial (or part of) at any time. LAVA has adopted an analysis based on a  
53  
54 283 modified intention to treat principle, i.e. all participants will be followed up and analysed in the  
55  
56 284 treatment group to which they were randomised provided a hysterectomy (of any type) was  
57  
58 285 undertaken unless they withdraw from the study  
59  
60

1  
2  
3 286  
4  
56 287 **6.3. Randomisation**

8  
9 288 Randomisation is provided by a secure online randomisation system at the Birmingham  
10  
11 289 Clinical Trials Unit (BCTU) (available at <http://www.trials.bham.ac.uk/lava>). Participants will  
12  
13 290 be randomised at the level of the individual in a 1:1 ratio to undergo their hysterectomy by  
14  
15 291 either a laparoscopic or open abdominal route. A minimisation algorithm will be used within  
16  
17 292 the online randomisation system to ensure balance in the treatment allocation over the  
18  
19 293 following variables:

- 22 294 • Previous caesarean section (yes / no)
- 23 295 • BMI ( $\leq 29.9$ , 30-34.9,  $\geq 35$  Kg/m<sup>2</sup>)
- 24 296 • Uterine Size ( $\leq 12$  weeks,  $> 12$  weeks)
- 25 297 • Planned retention of cervix (yes / no)
- 26 298 • Recruiting centre

27 299  
28  
29 300 **6.4. Blinding**

30  
31 301 Due to the differing natures of the intervention it is impossible to blind either the care  
32  
33 302 providers, investigators or participants to their allocated group.  
34

35 303  
36 304 **6.5. Interventions and expertise-based surgery**

37  
38 305 Hysterectomy is undertaken by either a laparoscopic or an open abdominal route, by a  
39  
40 306 surgeon who had self-declared as having expertise in laparoscopic hysterectomy,  
41  
42 307 abdominal hysterectomy or both approaches to hysterectomy  
43

44  
45 308 The decision to remove or retain cervix (total or sub-total) or remove and retain ovaries was  
46  
47 309 left to the discretion of the participant in consultation with her gynaecologist. The expertise  
48  
49 310 design process for eligible centres is depicted in (Figure 1).  
50  
51  
52  
53  
54  
55  
56  
57  
58  
59  
60

1  
2  
3 311 Satisfactory experience requires surgeons to have performed a minimum of 30 cases [24]  
4  
5 312 and to have a current caseload of at least 12 cases per year [25,26,27]. For surgeons to  
6  
7 313 conduct both procedures, these criteria will need to be met for both procedures. These  
8  
9 314 thresholds are evidence-based. In a series of over 10,000 laparoscopic hysterectomies,  
10  
11 315 surgeons who had performed more than 30 laparoscopic hysterectomies had a significantly  
12  
13 316 lower incidence of ureteric and bladder injuries (0.5% and 0.8% respectively) compared with  
14  
15 317 those performing 30 operations or fewer (2.2% and 2.0% respectively) [24].  
16  
17  
18

19 318 The importance of surgical experience as a predictor of successful surgical outcome has  
20  
21 319 been shown in other studies [25]. Surgical volume is well recognised to correlate with safety  
22  
23 320 in hysterectomy [26]. A systematic review and meta-analysis of studies including 741,760  
24  
25 321 patients reported complication rates according to surgical volume. High volume surgeons  
26  
27 322 were defined as performing at least one of a particular type of hysterectomy per month on  
28  
29 323 average (i.e. a minimum of 12 per year). Low volume surgeons performed fewer than 12  
30  
31 324 hysterectomies per year and had higher major complication rates (total complications (odds  
32  
33 325 ratio [OR] 1.3, 95% CI 1.2- 1.5%), intraoperative complications (OR 1.6, 95% CI, 1.2%-  
34  
35 326 2.1%) and postoperative complications (OR 1.4 95% CI 1.3%-1.4%) [27].  
36  
37  
38  
39 327  
40  
41  
42 328  
43

## 44 329 **7. Outcome Measures**

45  
46  
47 330  
48  
49

50 331 Women who give consent in a face to face setting will subsequently complete their baselines  
51  
52 332 questionnaires and then proceed to randomisation. The baseline questionnaires are self-  
53  
54 333 explanatory but help to complete them will be provided by the local or central medical research  
55  
56 334 teams on request using remote means (telephone / VOIP /video consultation) where feasible.  
57  
58 335 Participants will be made aware of this resource by the local research teams. It is anticipated  
59  
60 336 that some participants may need help to select their 8 personalised recovery targets from 29

options PROMIS-PF (Patient-Reported Outcomes Measurement Information System Physical Function) item bank v1.2 [19], [21,22,23]. Local research teams will offer remote (telephone, VOIP or video) contact, or exceptionally face to face appointments, to provide explanation.

340

## 341 **7.1. Trial Outcomes**

### 342 **7.1.1. Primary Outcome**

343 Major surgical complications. These will be objectively ascribed and largely in accordance with  
 344 the validated and widely used Clavien-Dindo classification of surgical complications [28]. They  
 345 will be defined as any of the following up to and including six full weeks' post-surgery: i) all  
 346 Clavien-Dindo grade III-V complications ii) Clavien-Dindo grade II complications of pulmonary  
 347 embolus or blood transfusion or; iii) haemorrhage  $\geq$  1L or; iv) major adverse anaesthetic  
 348 event. The specific type of major complication will be presented in addition to the Clavien-  
 349 Dindo grade III-V classification.

350 However, other less common major surgical or anaesthetic complications may arise and these  
 351 will be ascribed in accordance with the appropriate Clavien-Dindo classification shown in  
 352 (Table 1)

353

354 **TABLE 1**

355 **DEFINITION OF MAJOR SURGICAL COMPLICATIONS IN THE LAVA TRIAL**

356

|                         |                                                                                                                    |
|-------------------------|--------------------------------------------------------------------------------------------------------------------|
| Major haemorrhage       | Haemorrhage $\geq$ 1L                                                                                              |
| Clavien-Dindo grade II  | Pulmonary embolus, blood transfusion                                                                               |
| Clavien-Dindo grade III | Complication requiring surgical, endoscopic or radiological intervention                                           |
| Clavien-Dindo grade IV  | Life-threatening complication requiring management on a High Dependency Unit (HDU) / intensive therapy unit (ITU)* |

| Clavien-Dindo grade V   | Death                                                                                                                                                                                                                        |
|-------------------------|------------------------------------------------------------------------------------------------------------------------------------------------------------------------------------------------------------------------------|
| Major anaesthetic event | Anaphylaxis, awareness, nerve injury (including epidural/spinal anaesthesia), hypoxic brain injury, malignant hyperthermia, iatrogenic complication (e.g. pneumothorax from central line, limb ischaemia from arterial line) |

357

358 \*Non-life threatening elective or precautionary admission to an HDU (e.g. because of medical co-morbidities) post-  
 359 operatively will not be considered a grade IV complication.

360 Complication data occurring during and up to 6 weeks following hysterectomy will be  
 361 collected from the relevant case report forms completed by the local research team:

- 362 • Day of Surgery CRF
  - 363 ○ Detailing the type of major peri-operative complications
- 364 • Post-operative inpatient CRF
  - 365 ○ Detailing the type and timing of major surgical complications occurring during  
 366 inpatient stay up until hospital discharge)
- 367 • 6 week post-surgery complication and representation CRF
  - 368 ○ Detailing the type and timing of major post-operative complications, as well as any  
 369 reattendance and / or readmissions to hospital up to 6 weeks post-surgery, will be  
 370 recorded. The data will be acquired by the local research team from scrutiny of the  
 371 hospital case-notes and / or follow up consultation (if conducted routinely at  
 372 approximately 6 weeks post-hysterectomy).

373

#### 374 **7.1.2. Key secondary outcome**

375 Time from surgery to resumption of usual activities. To increase accuracy and to minimise  
 376 recall bias, the validated, personalised PROMIS-PF (Patient-Reported Outcomes  
 377 Measurement Information System Physical Function) item bank v1.2 will be used [19]. 29

1  
2  
3 378 items covering relevant activities for our study population will be used from the entire 121 item  
4  
5 379 bank [21]. Every item contains five response categories.  
6  
7

8 380 At baseline participants were asked to select 8 activities from this list of 29 that, in their view,  
9  
10 381 would most reflect their day-to-day activities. In this way participants created their  
11  
12 382 personalised physical function short form. Participants will record when each activity is  
13  
14 383 resumed, with full recovery being achieved once all 8 personalised activities have been  
15  
16 384 resumed. Until all personalised activities have resumed participants will be asked to complete  
17  
18 385 this weekly for the first 12 weeks, then fortnightly from week 13 to week 26 after which requests  
19  
20  
21 386 will cease.  
22  
23

24 387

### 26 388 **7.1.3. Other secondary outcomes**

#### 28 389 • Surgical outcomes:

- 30 390 ○ Duration of operation, (minutes)
- 31 391 ○ Estimated blood loss, (ml)

#### 33 392 • In hospital stay:

- 34 393 ○ In hospital post-operative pain using a Numerical rating scale (NRS) (with 0  
35 394 indicating no pain to 10 indicating maximum pain)\*, measured daily
- 36 395 ○ Total analgesia use\*
- 37 396 ○ Overall quality of recovery score taken from the Quality of Recovery 15 (QoR-  
38 397 15) questionnaire [25] (with 0 indicating worst recovery and 10 indicating best  
39 398 recovery), measured at approximately 24 hours post-operation\*
- 40 399 ○ Time from operation to discharge in days

#### 41 400 • Up to 14 days after surgery:

- 42 401 ○ Post-operative pain using a Numerical rating scale (NRS) (with 0 indicating no  
43 402 pain to 10 indicating maximum pain), measured daily
- 44 403 ○ Total analgesia use



- 1  
2  
3 404 ○ Overall quality of recovery score taken from the Quality of Recovery 15 (QoR-  
4  
5 405 15) questionnaire [25] (with 0 indicating worst recovery and 10 indicating best  
6  
7 406 recovery), measured at approximately 24 hours post-operation\*
- 8  
9 407 ○ Time from operation to discharge in days
- 10  
11 408 • Up to 6 weeks post-surgery:
- 12  
13 ○ Minor complications (Haemorrhage 500mL to  $\leq 1$  L; pyrexia [presumed  
14 409 infection] requiring antibiotics; pain uncontrolled with usual analgesic  
15 410 management; urinary retention requiring re-catheterization; catheterisation for  
16 411 longer than 72 hrs; pelvic haematoma NOT requiring radiological or surgical  
17 412 intervention; pelvic abscess NOT requiring radiological or surgical intervention;  
18 413 wound infections/complications managed at the bedside or on the ward)
- 19  
20 414 ○ Representation to hospital
- 21  
22 415 ○ Readmission to hospital
- 23  
24 416 ○ Use of health services
- 25  
26 417 ○ Time away from normal activities
- 27  
28 418 • 6 weeks post-surgery:
- 29  
30 419 ○ Quality of life score using EuroQol-5D-5L questionnaire [29] (with -0.285  
31 420 indicating worst possible value and 1.0 as best possible value)
- 32  
33 421 ○ Quality of life score using EuroQol-5D-5L visual analogue scale (with 0  
34 422 indicating worst possible score and 100 as best possible score)
- 35  
36 423 • 12 weeks post-surgery:
- 37  
38 424 ○ Quality of life score using EuroQol-5D-5L questionnaire [29] (with -0.285 indicating  
39 425 worst possible value and 1.0 as best possible value)
- 40  
41 426 ○ Quality of life score using EuroQol-5D-5L visual analogue scale
- 42  
43 427 ○ Time from surgery to work (if working) in days
- 44  
45 428 ○ Work productivity and activity impairment scores using WPAI-GH questionnaire  
46 429 [30] (absenteeism score; presenteeism score; work productivity loss score; activity  
47 430 impairment score – all scored 0 good to 100 bad) at 12 weeks only
- 48  
49  
50  
51  
52  
53  
54  
55  
56  
57  
58  
59  
60 431

- 1  
2  
3 432 • 12/24/36 months post-surgery:\*\*  
4  
5  
6 433 ○ Satisfaction with hysterectomy  
7  
8 434 ○ Symptoms of urogenital prolapse using the Pelvic Organ Prolapse Symptom Score  
9  
10 435 (POP-SS) questionnaire [31,32]  
11  
12 436 ○ Bladder function using Urogenital Distress Inventory (UDI) [33,34] questionnaire  
13  
14 437 ○ Bowel function using Defecatory Distress Inventory (DDI) [35] questionnaire  
15  
16 438 ○ Sexual function using the Sexual Activity (SAQ) questionnaire [36]  
17  
18 439 ○ Quality of life score using EuroQol-5D-5L questionnaire  
19  
20 440 ○ Quality of life score using EuroQol-5D-5L visual analogue scale  
21  
22 441 ○ Body image using the Body Image Scale (BIS) questionnaire [37]  
23  
24 442 ○ New gynaecological symptoms (abdominal pain [cyclical, non-cyclical and  
25  
26 443 dyspareunia] and vaginal bleeding; yes/no)  
27  
28 444 ○ Contact with Community Social and Clinical Care Services i.e. outpatients or  
29  
30 445 emergency visits, and hospital services e.g. re-presentations, re-admissions,  
31  
32 446 outpatient appointments and further medical treatment, time away from normal  
33  
34 447 activities.  
35  
36 448 • Throughout: Serious adverse events  
37  
38  
39  
40

41 449 \* Questionnaire may be completed at home if patient discharged on the same day as surgery  
42  
43

44 450 \*\*The latter two time-points will only be collected for participants who reach these times prior  
45  
46 451 to the study closes after all patients have been followed up for 12 months.  
47  
48

49 452 A summary of the schedule of assessments is shown in (Supplementary Table 1) and the trial  
50  
51 453 flow diagram shown is (Figure 2)  
52  
53

54 454  
55  
56  
57 455  
58  
59  
60 456

## 8. Statistical consideration

1  
2  
3 457  
45 458 **8.1. Sample size**  
6  
7

8 459 To enable 90% power to test the non-inferiority hypothesis at a one-sided 2.5% significance  
9  
10 460 level (two-sided 5% level) assuming a 3% margin of non-inferiority and a major surgical  
11  
12 461 complication rate of 6% in the abdominal (control) group requires 2634 participants. The  
13  
14 462 estimate of 6% is taken from a similar previous comparative study [11]. A 3% margin is  
15  
16 463 justifiable because of the trade-off of potentially swifter recovery with laparoscopic surgery; a  
17  
18 464 view shared by our patient focus group and is substantially less than the 5% difference  
19  
20 465 observed in the previous major trial [11] which led to the continued use of open abdominal  
21  
22 466 hysterectomy.  
23  
24  
25

26 467  
27  
28

29 468 An extra consideration is the potential for clustering by surgeon due to the expertise based  
30  
31 469 design [19,34] Under the assumption that each of the 50 centres will utilise 6 surgeons  
32  
33 470 (operating on approximately 9 patients on average during the study), along with an intra-  
34  
35 471 cluster correlation (ICC) estimate of 0.02, the sample size has been increased by 16% to 3055.  
36  
37 472 This ICC estimate used - in the absence of precise estimates - is considered conservative  
38  
39 473 given the outcome is clinical and of low prevalence, both of which are factors associated with  
40  
41 474 low ICC [35, 36]. However, even varying these factors up to an ICC of 0.07 or average cluster  
42  
43 475 size of 29, shows we will have at least 80% power to establish non-inferiority in these  
44  
45 476 situations. A final inflation of 6% to account for loss to follow-up brings the final sample size  
46  
47 477 total to 3250 participants. This size of sample would give the ability to detect meaningful  
48  
49 478 differences between groups in our key secondary outcome of time from surgery to resumption  
50  
51 479 of usual activities. Assuming the median recovery time in the abdominal group is between 6  
52  
53 480 and 9 weeks [37] we will have high levels of power (>90%) to detect reductions of 1 week in  
54  
55 481 all cases.  
56  
57  
58

59 482  
60

## 8.2. Analysis of outcome measures

A separate Statistical Analysis Plan will be produced and will provide a more comprehensive description of the planned statistical analyses. For the primary outcome, given the nature of the non-inferiority design, supportive per-protocol and CACE analyses [38] will be considered alongside the intention-to-treat population. All outcomes will be adjusted for the minimisation variables where possible.

For all major outcome measures, summary statistics and differences between groups, e.g. relative risks, will be presented with 95% confidence intervals. For the primary outcome, this is equivalent to a one-sided 97.5% confidence interval and hence conservative in terms of the non-inferiority margin. For the trial to declare non-inferiority of the laparoscopic approach, the upper margin of the absolute risk difference confidence interval must not exceed 3%.

For the key secondary outcome of time from surgery to resumption of usual activities, we will incorporate a conditional hierarchical approach to interpretation of the 95% confidence interval to ensure we appropriately control for the overall rate of type I error [39].

## 8.3. Primary Outcome Measure

We will use a mixed effect binomial regression model to estimate the absolute risk difference and 95% confidence interval (primary method). Relative risks will be calculated in a similar fashion. Parameters for treatment group as well as the minimisation variables will be included in the model as fixed effects. We will explore methods to most appropriate account for both centre and surgeon variation; these elements will also be included in the model as random effect.

#### 8.4. Secondary Outcome Measures

The key secondary outcome of time from surgery to resumption of normal activities will be analysed using a mixed effects ('frailty') Cox Proportional Hazard model [40], allowing the same minimisation variables and incorporating parameters for both centre and surgeon.

Linear regression models will be used to analyse response from continuous outcome measures such as, e.g. participant reported questionnaires, duration of surgery and pain via NRS; mean differences and 95% confidence intervals will be produced. Other binary and time-to-event analyses will be considered in the same fashion as the primary and key secondary outcomes. Satisfaction responses will be analysed using ordinal logistic regression. Serious adverse events will be summarised and analysed using a chi-squared test. Analgesia use will be summarised but not formally analysed.

We will capture recovery more fully with the other included validated outcome measures (e.g. PROMIS-PF (Patient-Reported Outcomes Measurement Information System Physical Function) item bank v1.2 [19], [21,22,23] Quality of Recovery 15 (QoR-15) questionnaire [25], numerical rating scales. The variation in analgesia type and use (secondary outcome) over the 14 day post-operative diary will presented descriptively because meaningful quantitative analysis is compromised due to the variation in type of analgesia and how to aggregate such data to allow valid comparison because meaningful quantitative analysis is compromised due to the variation in type of analgesia and how to aggregate such data to allow valid comparison. Appropriate summary statistics split by group will be presented for each outcome (e.g. proportions/percentages, mean/standard deviation or median/interquartile range).

#### 8.5. Subgroup Analyses

Subgroup analyses will be limited to the same variables used in the minimisation algorithm, and performed on the primary and key secondary outcomes. Given they will have low power

1  
2  
3 532 to assess non-inferiority on the primary outcome variable they will be treated as exploratory.  
4  
5 533 Tests for statistical heterogeneity (e.g. by including the treatment group by subgroup  
6  
7 534 interaction parameter in the regression model) will be undertaken.  
8  
9

10 535

### 13 536 **8.6. Missing Data and Sensitivity Analyses**

16 537 Every attempt will be made to collect full follow-up data on all study participants; it is thus  
17  
18 538 anticipated that missing data will be minimal. Participants with missing primary outcome data  
19  
20 539 will not be included in the primary analysis in the first instance. This presents a risk of bias,  
21  
22 540 and sensitivity analyses will be undertaken to assess the possible impact of the risk.  
23  
24

25 541

### 28 542 **8.7. Planned Interim Analysis**

31 543 Interim analyses of safety and efficacy for presentation to the independent DMC will take place  
32  
33 544 during the study. The committee will meet prior to study commencement to agree the manner  
34  
35 545 and timing of such analyses but this is likely to include the analysis of the primary and key  
36  
37 546 secondary outcome and full assessment of safety (SAEs) at least at annual intervals. Criteria  
38  
39 547 for stopping or modifying the study based on this information will be ratified by the DMC.  
40  
41 548 Details of the agreed plan will be written into the Statistical Analysis Plan.  
42  
43

44 549

### 47 550 **8.8. Planned Final Analyses**

51 551 The primary analysis for the study will occur once all participants have completed the  
52  
53 552 assessments at 12 months post-surgery and corresponding outcome data has been entered  
54  
55 553 onto the study database and validated as being ready for analysis. This analysis will include  
56  
57 554 data items up to and including this time-point only. The longer term data collected at 24 months  
58  
59 555 and 36 months post-surgery will be restricted to the subgroup of patients who have reached  
60

1  
2  
3 556 these assessment points prior to study close and reported at a later date (see Trial Schema)  
4  
5 557 (Figure 2)  
6  
7  
8  
9 558

## 11 559 **9. Sub-studies**

13  
14 560

15  
16  
17 561 Full details of these sub-studies are available from the authors on request  
18  
19

### 20 562 **9.1. Qualitative process evaluation**

21  
22  
23 563 A qualitative process evaluation was undertaken in parallel to the pilot phase. The primary aim  
24  
25 564 of the qualitative study was to explore the feasibility, acceptability and appropriateness of the  
26  
27 565 trial and intervention for women and healthcare professionals (HCPs). The results were to  
28  
29 566 inform decision-making around progression to a full trial, including study design and  
30  
31 567 processes.  
32  
33

34 568

### 36 569 **9.2. Health economic evaluation**

37  
38  
39  
40 570 An economic evaluation was designed to assess the cost-effectiveness of laparoscopic  
41  
42 571 hysterectomy compared to open abdominal hysterectomy in the management of benign  
43  
44 572 gynaecological conditions. A within trial-based economic evaluation was to explore the cost-  
45  
46 573 effectiveness of laparoscopic hysterectomy compared to open abdominal hysterectomy. The  
47  
48 574 principal outcomes for the economic evaluation was cost per QALY at 12 months post-surgery.  
49  
50 575 A secondary analyses was planned  
51  
52  
53 576 to generate costs per major surgical complication avoided and costs per return to normal  
54  
55 577 activities.  
56  
57

58 578  
59  
60

1  
2  
3 579 **9.3. Data collection**  
4  
5

6 580 In the first instance, participants will be invited to participate in an interview via  
7  
8 581 telephone/video conference (e.g. Zoom, Skype or WhatsApp). To ensure inclusivity, where  
9  
10 582 participants are unable to participate virtually, we may consider face to face interviews in the  
11  
12 583 clinic where they were treated/work, at the University of Birmingham (if local to Birmingham),  
13  
14 584 in the participant's home or in an appropriate public space

15  
16 585 For women, we will aim to conduct interviews within four to six weeks of them being  
17  
18 586 approached to participate (decliners) or being randomised (women who consent to  
19  
20 587 randomisation). This will however remain flexible to accommodate the needs of the women.  
21  
22

23 588

24  
25  
26 589 **9.4. Management of risk**  
27

28  
29 590 If a participant raises issues about their care that the qualitative research team deem as  
30  
31 591 potentially harmful to them (or others) then the researcher will advise them to contact their  
32  
33 592 local Patient Advice and Liaison Service (PALS) (or equivalent) whose contact details are  
34  
35 593 provided in the PIS. The lead for the qualitative sub-study will also inform the CI. The CI,  
36  
37 594 where appropriate, will ensure that the local unit PI is aware of the woman and potential  
38  
39 595 concerns so that follow-up can be arranged if required. Should a participant have questions  
40  
41 596 about their clinical care then the qualitative research team will advise the woman to contact  
42  
43 597 her clinical team and/or her GP.  
44

45 598

46  
47  
48  
49 599

50  
51 600 **10. Data management**  
52

53 601

54  
55  
56 602 Data Protection Registration: The University of Birmingham has Data Protection Registration  
57  
58 603 to cover the purposes of analysis and for the classes of data requested. The University's  
59  
60 604 Data Protection Registration number is Z6195856.



605 Coding and validation will be agreed between the trial's coordinator, statistician and  
 606 programmer and the trial database will be signed off once the implementation of these has  
 607 been assured.

608 Data can be entered onto the bespoke trial database by staff at BCTU, delegated staff at site  
 609 or, in the case of participant completed questionnaires, the participant themselves if an on-  
 610 line option is available.

## 611 DATA SOURCE CAN BE FOUND IN (TABLE 2)

612 TABLE 2

### 613 DATA SOURCE

| Data                          | Source                                                                                                                                                                                                                                                                                                                                                                                                                                                                                                           |
|-------------------------------|------------------------------------------------------------------------------------------------------------------------------------------------------------------------------------------------------------------------------------------------------------------------------------------------------------------------------------------------------------------------------------------------------------------------------------------------------------------------------------------------------------------|
| Participant Reported Outcomes | The original participant-completed CRF is the source and will be kept with the participant's trial record at site, whilst copies will be provided to the Trials Office                                                                                                                                                                                                                                                                                                                                           |
| Lab results                   | The original lab report (which may be electronic) is the source data and will be kept and maintained in line with normal local practice. Information will be transcribed onto CRFs                                                                                                                                                                                                                                                                                                                               |
| Imaging                       | The source is the original imaging usually as an electronic file. Data may be supplied to the Trials Office as a password-protected, anonymised, copy of the electronic file, or as an interpretation of the imaging provided on a CRF. This will be transferred via fax or secure email, and stored on a secure computer server at the University of Birmingham. Where data is interpreted, the CRF onto which it is transcribed becomes the source. A copy of the CRF should be provided to the Trials Office. |
| Clinical event data           | The original clinical annotation is the source data. This may be found on clinical correspondence, or electronic or paper participant records. Clinical events reported by the participant, either in or out of clinic (e.g. phone calls), must be documented in the source data.                                                                                                                                                                                                                                |
| Health Economics data         | Often obtained by interview directly with the participant for transcription onto the CRF.                                                                                                                                                                                                                                                                                                                                                                                                                        |
| Recruitment                   | The original record of the randomisation is the source. It is held on University of Birmingham servers as part of the randomisation and data entry system.                                                                                                                                                                                                                                                                                                                                                       |

614

615

## 616 11. Discussion

617

618 The LAVA trial protocol was designed in 2019 and amended during 2020 before funding and  
 619 ethical approval was granted. The trial commenced recruitment in September 2021 but failed  
 620 to meet its RAG ('red; amber; green) criteria for site set up and recruitment rate and so for this

1  
2  
3 621 reason and the recognition by the funder (The NIHR HTA Programme) of insufficient NHS  
4  
5 622 clinical and Research & Development capacity post the Covid-19 pandemic, the trial was  
6  
7 623 closed. The research question remains relevant, given that almost 30,000 hysterectomies are  
8  
9 624 undertaken per year [7,18] and especially now that the laparoscopic approach to hysterectomy  
10  
11 625 is being facilitated further by advances in instrumentation including robotic surgery [40,41].  
12  
13 626 Our research group plans to analyse qualitative and quantitative data acquired from the  
14  
15 627 commencement of the trial to inform future surgical trials and aid future researchers wishing  
16  
17 628 to undertake comparative trials in hysterectomy. We believe that our carefully considered  
18  
19 629 protocol will be of value to future researchers working in the field of optimising clinical  
20  
21 630 outcomes for women undergoing hysterectomy.  
22  
23  
24  
25 631  
26  
27  
28 632  
29  
30  
31 633 **12. Strengths and limitations**  
32  
33  
34 634  
35  
36 635 The LAVA trial was larger than all the previous 25 RCTs evaluating laparoscopic and open  
37  
38 636 hysterectomy and of higher quality, addressing the methodological deficiencies of previous  
39  
40 637 trials; namely their power to show a meaningful difference, the validity of outcomes  
41  
42 638 assessment, especially the key outcome of recovery and a failure to account for surgical  
43  
44 639 expertise. In the LAVA trial we used a novel, validated, personalised recovery tool [16,21,22],  
45  
46 640 and employed an expertise-based design to mitigate against surgical expertise bias [18,34].  
47  
48 641 Third part randomisation was performed balancing important prognostic variables. Due to the  
49  
50 642 differing natures of the intervention it is impossible to blind either the care providers,  
51  
52 643 investigators or participants to their allocated group.  
53  
54  
55  
56 644  
57  
58  
59 645  
60

### 13. Potential impact and implications

Hysterectomy is common, with one in ten women undergoing the procedure in their lifetime, mostly for benign conditions [12,13,14]. The operation imposes substantial morbidity upon women, disrupts families and impacts upon wider society through utilisation of scarce health care resources and lost productivity [3,4,5,6] [15]. These burdens could potentially be reduced with safe, less invasive surgery allowing quicker recovery. Currently, most hysterectomies are performed abdominally because this traditional method is thought to minimise intra-operative complications but the increased trauma of an abdominal incision can prolong recovery [2]. This may be especially true in overweight and obese women, where morbidity is greater from mobility restrictions and wound infection [16].

Laparoscopic hysterectomy avoids the need for a large surgical incision speeding recovery for most women but has been associated with serious complications and specialist surgical skills. However, scientific advances in imaging and equipment, has made laparoscopic surgery easier as well as more accessible to general gynaecologists [11] [16,17]. Furthermore, laparoscopic surgery forms an integral part of modern packages of nursing, anaesthetic and surgical care designed to enhance recovery and allow 24 hour hospital discharge [20].

The wider adoption of contemporary laparoscopic hysterectomy has the potential to minimise morbidity, expedite recovery and improve clinical outcomes for women in the short-term and longer-term. Furthermore, enhanced recovery has the potential to be economically advantageous to the NHS through resource efficiencies and wider society via increased productivity.

1  
2  
3 671 **14. Ethics and dissemination**  
4  
5

6 672  
7

8  
9 673 The study was approved by the West Midlands-Edgbaston Research Ethics Committee. REC  
10 674 approval for the protocol was issued on 18<sup>th</sup> February 2021. All participants gave informed  
11  
12 675 consent before participation. The trial was being conducted in accordance with the Research  
13  
14 676 Governance Framework for Health and Social Care, the applicable UK Statutory Instruments,  
15  
16 677 (which include the Data Protection Act 1998) and the Principles of GCP.  
17  
18  
19

20 678  
21  
22

23 679 The findings will be presented and disseminated via the BSGE, RCOG and other national and  
24  
25 680 international conferences. We will also aim to publish the findings in high impact peer reviewed  
26  
27 681 journals. We will disseminate the completed paper to the Department of Health, the Scientific  
28  
29 682 Advisory Committees of the RCOG, the Royal College of Nurses (RCN) and the BSGE.  
30  
31

32 683  
33  
34

35 684  
36  
37

38 685 **15. Confidentiality**  
39  
40

41 686  
42  
43

44 687 Personal data recorded on all documents will be regarded as strictly confidential and will be  
45  
46 688 handled and stored in accordance with the Data Protection Act 1998.

47  
48 689 Participants will always be identified using their unique trial identification number and partial  
49  
50 690 date of birth (month / year) on the Case Report Form and correspondence between BCTU  
51  
52 691 and local centres.

53  
54 692 The Investigator must maintain documents not for submission to BCTU (e.g. Participant  
55  
56 693 Identification Logs) in strict confidence.  
57  
58  
59  
60

1  
2  
3 694 BCTU will maintain the confidentiality of all participant's data and will not disclose  
4  
5 695 information by which participants may be identified to any third party other than those  
6  
7 696 directly involved in the treatment of the participant and organisations for which the  
8  
9 697 participant has given explicit consent for data transfer (e.g. laboratory staff, competent  
10  
11 698 authority, sponsor).  
12

13 699

14 700

## 15 16 17 18 19 701 **16. Trial organisational structure**

20 702

### 21 22 23 24 25 703 **16.1. Sponsor**

26  
27  
28 704 University of Birmingham.

29  
30  
31 705 Contact Details: Research Governance, University of Birmingham, Edgbaston, Birmingham,  
32  
33 706 B15 2TT. Email: [researchgovernance@contacts.bham.ac.uk](mailto:researchgovernance@contacts.bham.ac.uk)

34 707

### 35 36 37 38 708 **16.2. Coordinating Centre**

39  
40  
41 709 The trial coordinating centre (Trial Office) is Birmingham Clinical Trials Unit, based at the  
42  
43 710 University of Birmingham.

44 711

### 45 46 47 712 **16.3. Trial Management Group**

48  
49 713 The Trial Management Group will take responsibility for the day-to-day management of the  
50  
51 714 trial, and will include (but is not limited to) the CI, co-applicants, statistician, team leader and  
52  
53 715 trial manager. The role of the group is to monitor all aspects of the conduct and progress of  
54  
55 716 the trial, ensure that the protocol is adhered to and take appropriate action to safeguard  
56  
57 717 participants and the quality of the trial itself.

58 718

1  
2  
3 719 **16.4. Trial Steering Committee (TSC)**  
4

5 720 The role of the Trial Steering Committee (TSC) is to provide the overall supervision of the trial.  
6  
7 721 Ideally, the TSC should include members who are independent of the investigators, their  
8  
9 722 employing organisations, funders and sponsors. The TSC should monitor trial progress and  
10  
11 723 conduct and advise on scientific credibility. The TSC will consider and act, as appropriate,  
12  
13 724 upon the recommendations of the Data Monitoring Committee (DMC) or equivalent and  
14  
15 725 ultimately carries the responsibility for deciding whether a trial needs to be stopped on grounds  
16  
17 726 of safety or efficacy.  
18  
19  
20  
21 727

22  
23 728 **16.5. Data monitoring committee**  
24

25 729 Data analyses will be supplied in confidence to an independent Data Monitoring Committee  
26  
27 730 (DMC), which will be asked to give advice on whether the accumulated data from the trial,  
28  
29 731 together with the results from other relevant research, justifies the continuing recruitment of  
30  
31 732 further participants. The DMC will operate in accordance with a trial specific charter based  
32  
33 733 upon the template created by the Damocles Group. The DMC will meet at regular intervals  
34  
35 734 that will allow them to effectively monitor the trial unless there is a specific reason (e.g.  
36  
37 735 safety phase) to amend the schedule.  
38  
39  
40  
41 736  
42  
43 737

44  
45  
46 738 **17. Amendments**  
47  
48  
49 739

50  
51  
52 740 As sponsor, The University of Birmingham will be responsible for deciding whether an  
53  
54 741 amendment is substantial or non-substantial. Substantive changes will be submitted to  
55  
56 742 REC for approval. Once this has been received, R&D departments will be notified of the  
57  
58 743 amendment and requested to provide their approval. If no response is received within 35  
59  
60

1  
2  
3 744 days, an assumption will be made that the site has no objection to the amendment and it  
4  
5 745 will be implemented at the site.  
6  
7 746  
8  
9  
10 747  
11  
12

13 748 **18. Access to the final trial dataset**  
14

15 749  
16  
17 750 During the period of the study only the trial steering group will have access to the full trial  
18  
19 751 dataset. Following publication of the findings, the final trial dataset will be made available to  
20  
21 752 external researchers upon approval from the trial management group and the BCTU data  
22  
23 753 sharing committee in line with standard data sharing practices for clinical trial data sets.  
24  
25  
26 754  
27  
28  
29 755

30 756 **19. Post-trial care**  
31  
32  
33 757

34  
35 758 All patients will continue to receive standard medical care following participation in the  
36  
37 759 clinical trial. There are no interventions that participant's will be prevented from accessing  
38  
39 760 after their participation in the trial has been completed.  
40  
41 761  
42  
43  
44 762  
45  
46

47 763 **20. Publication policy**  
48  
49 764  
50  
51

52 765 Authors must acknowledge that the trial was performed with the support of the University  
53  
54 766 of Birmingham and Birmingham Clinical Trials Unit. Intellectual property rights will be  
55  
56 767 addressed in the Clinical Study Site Agreement between Sponsor and site.  
57  
58 768  
59  
60

1  
2  
3 769 Results of the study will be shared with study participants, staff members at research  
4  
5 770 sites and investigators of other studies related to hysterectomy and benign  
6  
7 771 gynaecological surgery.  
8

9 772

10  
11  
12 773

## 15 774 **21. Auditing**

16  
17 775

18  
19  
20 776 The Investigator will permit trial-related monitoring, audits, ethical review, and regulatory  
21  
22 777 inspection(s) at their site, providing direct access to source data/documents.  
23

24 778

25  
26  
27 779

## 30 780 **Acknowledgments**

31  
32 781 The authors thank Dr Zeyah Sairally, and Dr Lynsey Matthews for their help in the LAVA trial.  
33

34  
35 782

36  
37 783

## 41 784 **Statements**

42  
43  
44 785

45  
46  
47 786 **Author's contribution:** TJC, LM, PB, JF, MM, KC, ES, LJ, PS, TR, WM, SB, RW were  
48  
49  
50 787 involved in conception and trial design. TJC, LA and were involved in drafting of the article.  
51  
52 788 TJC reviewed and critiqued the article for intellectual content. All the authors were involved in  
53  
54 789 final approval of the article.  
55

56  
57 790

58  
59  
60 791 **Competing interests statement:** None declared.



792

793 **Funding:** Funding for the LAVA trial is provided by an award from the National Institute of  
794 Health Research Health Technology Assessment program. Ref: NIHR128991.

795

796

797 **References**

798

- 799 1. Ruiz de Azua Unzurrunzaga G, Brewster DH, Wild SH, Sivalingam VN. Declining  
800 hysterectomy prevalence and the estimated impact on uterine cancer incidence in  
801 Scotland. *Cancer Epidemiol* 2019;**59**:227-31.  
802 <https://doi.org/10.1016/j.canep.2019.02.008>.
- 803 2. ACOG Committee Opinion No. 444: choosing the route of hysterectomy for benign  
804 disease. *Obstet Gynecol* 2009;**114**:1156-8.  
805 <https://doi.org/10.1097/AOG.0b013e3181c33c72>.
- 806 3. Nieboer TE, Johnson N, Lethaby A, Tavender E, Curr E, Garry R, *et al*. Surgical  
807 approach to hysterectomy for benign gynaecological disease. *Cochrane Database Syst*  
808 *Rev* 2009; 10.1002/14651858.CD003677.pub4:CD003677.  
809 <https://doi.org/10.1002/14651858.CD003677>.
- 810 4. Middleton LJ, Champaneria R, Daniels JP, Bhattacharya S, Cooper KG, Hilken NH, *et*  
811 *al*. Hysterectomy, endometrial destruction, and levonorgestrel releasing intrauterine  
812 system (Mirena) for heavy menstrual bleeding: systematic review and meta-analysis of  
813 data from individual patients. *BMJ* 2010;**341**:c3929. <https://doi.org/10.1136/bmj.c3929>.
- 814 5. Aarts JW, Nieboer TE, Johnson N, Tavender E, Garry R, Mol BW, *et al*. Surgical  
815 approach to hysterectomy for benign gynaecological disease. *Cochrane Database Syst*

- 1  
2  
3 816 Rev 2015; 10.1002/14651858.CD003677.pub5:CD003677.  
4  
5 817 <https://doi.org/10.1002/14651858.CD003677>.  
6  
7 818 6. Royal College of Obstetricians and Gynaecologists LSoHTM, Ipsos MORI. *National*  
8  
9 819 *Heavy Menstrual Bleeding Audit: Final report*. London, UK. RCOG Press; 2014. URL:  
10  
11 820 <https://www.rcog.org.uk/globalassets/documents/guidelines/research-->  
12  
13 821 [audit/national\\_hmb\\_audit\\_final\\_report\\_july\\_2014.pdf](https://www.rcog.org.uk/globalassets/documents/guidelines/research--audit/national_hmb_audit_final_report_july_2014.pdf) (accessed).  
14  
15 822 7. Royal College of Obstetricians and Gynaecologists LU. *Patterns of Benign*  
16  
17 823 *Gynaecology Care in English NHS Hospital Trusts 2015/16.*; 2018. URL:  
18  
19 824 <https://www.rcog.org.uk/en/guidelines-research-services/audit-quality->  
20  
21 825 [improvement/clinical-indicators-programme/benign-gynaecological-care/benign-](https://www.rcog.org.uk/en/guidelines-research-services/audit-quality-improvement/clinical-indicators-programme/benign-gynaecological-care/benign-gynaecology-report-2015-16/)  
22  
23 826 [gynaecology-report-2015-16/](https://www.rcog.org.uk/en/guidelines-research-services/audit-quality-improvement/clinical-indicators-programme/benign-gynaecological-care/benign-gynaecology-report-2015-16/) (accessed).  
24  
25 827 8. Liu Z, Doan QV, Blumenthal P, Dubois RW. A systematic review evaluating health-  
26  
27 828 related quality of life, work impairment, and health-care costs and utilization in abnormal  
28  
29 829 uterine bleeding. *Value Health* 2007;**10**:183-94. <https://doi.org/10.1111/j.1524->  
30  
31 830 [4733.2007.00168](https://doi.org/10.1111/j.1524-4733.2007.00168).  
32  
33 831 9. Frick KD, Clark MA, Steinwachs DM, Langenberg P, Stovall D, Munro MG, *et al*.  
34  
35 832 Financial and quality-of-life burden of dysfunctional uterine bleeding among women  
36  
37 833 agreeing to obtain surgical treatment. *Womens Health Issues* 2009;**19**:70-8.  
38  
39 834 <https://doi.org/10.1016/j.whi.2008.07.002>  
40  
41 835 10. Blikkendaal MD, Schepers EM, van Zwet EW, Twijnstra AR, Jansen FW. Hysterectomy  
42  
43 836 in in very obese and morbidly obese patients: a systematic review with cumulative  
44  
45 837 analysis of comparative studies. *Arch Gynecol Obstet* 2015;**292**:723-38.  
46  
47 838 <https://doi.org/10.1007/s00404-015-3680-7>  
48  
49  
50  
51  
52 839 11. Garry R, Fountain J, Mason S, Hawe J, Napp V, Abbott J, *et al*. The eVALuate study:  
53  
54 840 two parallel randomised trials, one comparing laparoscopic with abdominal  
55  
56 841 hysterectomy, the other comparing laparoscopic with vaginal hysterectomy. *BMJ*  
57  
58 842 2004;**328**:129. <https://doi.org/10.1136/bmj.37984.623889.F6>.  
59  
60

- 1  
2  
3 843 12. Ghezzi F, Uccella S, Cromi A, Siesto G, Serati M, Bogani G, *et al.* Postoperative pain  
4  
5 844 after laparoscopic and vaginal hysterectomy for benign gynecologic disease: a  
6  
7 845 randomized trial. *Am J Obstet Gynecol* 2010;**203**:118 e1-8.  
8  
9 846 <https://doi.org/10.1016/j.ajog.2010.04.026>.
- 11 847 13. Song T, Cho J, Kim TJ, Kim IR, Hahm TS, Kim BG, *et al.* Cosmetic outcomes of  
12  
13 848 laparoendoscopic single-site hysterectomy compared with multi-port surgery:  
14  
15 849 randomized controlled trial. *J Minim Invasive Gynecol* 2013;**20**:460-7.  
16  
17 850 <https://doi.org/10.1016/j.jmig.2013.01.010>.
- 19 851 14. Paraiso MF, Ridgeway B, Park AJ, Jelovsek JE, Barber MD, Falcone T, *et al.* A  
20  
21 852 randomized trial comparing conventional and robotically assisted total laparoscopic  
22  
23 853 hysterectomy. *Am J Obstet Gynecol* 2013;**208**:368 e1-7.  
24  
25 854 <https://doi.org/10.1016/j.ajog.2013.02.008>.
- 28 855 15. Janssen MF, Bonsel GJ, Luo N. Is EQ-5D-5L Better Than EQ-5D-3L? A Head-to-Head  
29  
30 856 Comparison of Descriptive Systems and Value Sets from Seven Countries.  
31  
32 857 *PharmacoEconomics* 2018;**36**:675-97. <https://doi.org/10.1007/s40273-018-0623-8>.
- 34 858 16. Lee SH, Oh SR, Cho YJ, Han M, Park JW, Kim SJ, *et al.* Comparison of vaginal  
35  
36 859 hysterectomy and laparoscopic hysterectomy: a systematic review and meta-analysis.  
37  
38 860 *BMC Womens Health* 2019;**19**:83. <https://doi.org/10.1186/s12905-019-0784-4>.
- 41 861 17. Madhvani K, Curnow T, Carpenter T. Route of hysterectomy: a retrospective, cohort  
42  
43 862 study in English NHS Hospitals from 2011 to 2017. *BJOG* 2019;**126**:795-802.  
44  
45 863 <https://doi.org/10.1111/1471-0528.15539>.
- 47 864 18. Cook JA, Elders A, Boachie C, Bassinga T, Fraser C, Altman DG, *et al.* A systematic  
48  
49 865 review of the use of an expertise-based randomised controlled trial design. *Trials*  
50  
51 866 2015;**16**:241. <https://doi.org/10.1186/s13063-015-0739-5>.
- 53 867 19. Rose M, Bjorner JB, Gandek B, Bruce B, Fries JF, Ware JE, Jr. The PROMIS Physical  
54  
55 868 Function item bank was calibrated to a standardized metric and shown to improve  
56  
57 869 measurement efficiency. *J Clin Epidemiol* 2014;**67**:516-26.  
58  
59 870 <https://doi.org/10.1016/j.jclinepi.2013.10.024>.

- 1  
2  
3 871 20. Barber EL, Van Le L. Enhanced Recovery Pathways in Gynecology and Gynecologic  
4  
5 872 Oncology. *Obstet Gynecol Surv* 2015;**70**:780-92. <https://doi.org/10.1097/OGX>.  
6  
7 873 21. Hagen S, Glazener C, Sinclair L, Stark D, Bugge C. Psychometric properties of the  
8  
9 874 pelvic organ prolapse symptom score. *BJOG* 2009;**116**:25-31.  
10  
11 875 <https://doi.org/10.1111/j.1471-0528.2008.01903.x>.  
12  
13 876 22. Van Brummen HJ, Bruinse HW, van de Pol G, Heintz AP, van der Vaart CH. Defecatory  
14  
15 877 symptoms during and after the first pregnancy: prevalences and associated factors. *Int*  
16  
17 878 *Urogynecol J Pelvic Floor Dysfunct* 2006;**17**:224-30. <https://doi.org/10.1007/s00192->  
18  
19 879 [005-1351-0](https://doi.org/10.1007/s00192-005-1351-0).  
20  
21 880  
22  
23 881  
24  
25 882 23. Thirlaway K, Fallowfield L, Cuzick J. The Sexual Activity Questionnaire: a measure of  
26  
27 883 women's sexual functioning. *Qual Life Res* 1996;**5**:81-90.  
28  
29 884 <https://doi.org/10.1007/BF00435972>.  
30  
31 885 24. Mäkinen J, Johansson J, Tomás C, Tomás E, Heinonen PK, Laatikainen T, Kauko  
32  
33 886 M, Heikkinen A, Sjöberg J. Morbidity of 10110 hysterectomies by type approach,  
34  
35 887 Human Reprod 2001;**16** :1473-1478.  
36  
37 888 25. Twijnstra AR, Blikkendall MD, von Zwet EW, van Kersteren PJ, deKroon CD, Jansen  
38  
39 889 FW. Predictors of successful surgical outcome in laparoscopic hysterectomy. *Obstet*  
40  
41 890 *Gynecol.* 2012;**119**:700–7  
42  
43 891 26. Glaser LM, Brennan L, King LP, Milad MP. Surgeon Volume in Benign Gynecologic  
44  
45 892 Surgery: Review of Outcomes, Impact on Training, and Ethical Contexts. *J Minim*  
46  
47 893 *Invasive Gynecol.* 2019;**26**:279-287. doi: 10.1016/j.jmig.2018.09.775  
48  
49 894 27. Mowat A, Maher C, Ballard E. Surgical outcomes for low-volume vs high-volume  
50  
51 895 surgeons in gynecology surgery: a systematic review and meta-analysis. *Am J Obstet*  
52  
53 896 *Gynecol* 2016;**215**:21-33.  
54  
55  
56  
57  
58  
59  
60

- 1  
2  
3 897 28. Dindo D, Demartines N, Clavien PA. Classification of surgical complications: a new  
4  
5 898 proposal with evaluation in a cohort of 6336 patients and results of a survey. *Ann Surg*  
6  
7 899 2004;**240**:205-13. <https://doi.org/10.1097/01>.  
8  
9  
10 900 29. EuroQol--a new facility for the measurement of health-related quality of life. *Health*  
11  
12 901 *Policy* 1990;**16**:199-208. [https://doi.org/10.1016/0168-8510\(90\)90421-9](https://doi.org/10.1016/0168-8510(90)90421-9).  
13  
14 902 30. Reilly MC, Zbrozek AS, Dukes EM. The validity and reproducibility of a work productivity  
15  
16 903 and activity impairment instrument. *Pharmacoeconomics* 1993;**4**:353-65.  
17  
18 904 <https://doi.org/10.2165/00019053-199304050-00006>.  
19  
20 905 31. Hagen S, Glazener C, Sinclair L, Stark D, Bugge C. Psychometric properties of the  
21  
22 906 pelvic organ prolapse symptom score. *BJOG* 2009;**116**:25-31.  
23  
24 907 <https://doi.org/10.1111/j.1471-0528.2008.01903.x>.  
25  
26 908 32. Groenendijk AG, Birnie E, Roovers JP, Bonsel GJ. Contribution of primary pelvic organ  
27  
28 909 prolapse to micturition and defecation symptoms. *Obstet Gynecol Int*  
29  
30 910 2012;**2012**:798035.  
31  
32 911 33. Uebersax JS, Wyman JF, Shumaker SA, McClish DK, Fantl JA. Short forms to assess  
33  
34 912 life quality and symptom distress for urinary incontinence in women: The Incontinence  
35  
36 913 Impact Questionnaire and the Urogenital Distress Inventory. Continence Program for  
37  
38 914 Women Research Group. *Neurourol Urodyn* 1995;**14**:131-9.  
39  
40 915 <https://doi.org/10.1002/nau.1930140206>.  
41  
42  
43 916 34. Van Brummen HJ, Bruinse HW, van de Pol G, Heintz AP, van der Vaart CH. Defecatory  
44  
45 917 symptoms during and after the first pregnancy: prevalences and associated factors. *Int*  
46  
47 918 *Urogynecol J Pelvic Floor Dysfunct* 2006;**17**:224-30. <https://doi.org/10.1007/s00192->  
48  
49 919 005-1351-0.  
50  
51 920 35. Thirlaway K, Fallowfield L, Cuzick J. The Sexual Activity Questionnaire: a measure of  
52  
53 921 women's sexual functioning. *Qual Life Res* 1996;**5**:81-90.  
54  
55 922 <https://doi.org/10.1007/BF00435972>.  
56  
57  
58  
59  
60

- 1  
2  
3 923 36. Hopwood P, Fletcher I, Lee A, Al Ghazal S. A body image scale for use with cancer  
4  
5 924 patients. *Eur J Cancer* 2001;**37**:189-97. [https://doi.org/10.1016/s0959-8049\(00\)00353-](https://doi.org/10.1016/s0959-8049(00)00353-1)  
6  
7 925 1.  
8  
9 926 37. Hewitt CE, Torgerson DJ, Miles JN. Is there another way to take account of  
10  
11 927 noncompliance in randomized controlled trials? *CMAJ* 2006;**175**:347.  
12  
13 928 <https://doi.org/10.1503/cmaj.051625>.  
14  
15 929 38. Huque MFD, A. ; D'Agostino, R. Multiplicity Issues in Clinical Trials With Multiple  
16  
17 930 Objectives. *Statistics in Biopharmaceutical Research* 2013;**5**.  
18  
19 931 39. Austin PC. A Tutorial on Multilevel Survival Analysis: Methods, Models and  
20  
21 932 Applications. *Int Stat Rev* 2017;**85**:185-203. <https://doi.org/10.1111/insr.12214>.  
22  
23 933 40. Gitas G, Hanker L, Rody A, Ackermann J, Alkatout I. Robotic surgery in gynecology: is  
24  
25 934 the future already here? *Minim Invasive Ther Allied Technol*. 2022 Aug;**31**(6):815-824.  
26  
27 935 doi: 10.1080/13645706.2021.2010763.  
28  
29 936 41. Totaro A, Competella M, Bientinesi R, Gandi C, Palermo G, Russo A, Aceto P, Bassi P,  
30  
31 937 Sacco E. The new surgical robotic platform HUGO™ RAS: System description and  
32  
33 938 docking settings for robot-assisted radical prostatectomy. *Urologia*. 2022  
34  
35 939 Nov;**89**(4):603-609. doi: 10.1177/03915603221107855.  
36  
37 940  
38  
39 941  
40  
41  
42  
43  
44  
45  
46  
47  
48  
49  
50  
51  
52  
53  
54  
55  
56  
57  
58  
59  
60

1  
2  
3  
4  
5  
6  
7  
8  
9  
10  
11  
12  
13  
14  
15  
16  
17  
18  
19  
20  
21  
22  
23  
24  
25  
26  
27  
28  
29  
30  
31  
32  
33  
34  
35  
36  
37  
38  
39  
40  
41  
42  
43  
44  
45  
46  
47  
48  
49  
50  
51  
52  
53  
54  
55  
56  
57  
58  
59  
60

943

For peer review only

**Figure 1**

The expertise design process for eligible centres

**Confirm eligibility of participating centre**

Members of the Local Surgical Unit (LSU)<sup>1</sup> should:

- (1) Be able to provide laparoscopic AND open hysterectomy for benign conditions by surgeons who meet the threshold for expertise<sup>2</sup>
- (2) Have at least one surgeon willing to randomise to LAVA
- (3) Be able to agree local eligibility criteria (i.e. criteria to undertake either laparoscopic OR open hysterectomy)

**Identify and confirm surgical expertise<sup>2</sup> within the participating centre**

- Expert surgeon LAPAROSCOPIC
- Expert surgeon OPEN

**Randomisation by local research team**

Eligibility confirmed by a surgeon willing to randomise to LAVA<sup>3</sup>

**Laparoscopic hysterectomy**  
Allocated LAPAROSCOPIC expert surgeon<sup>4</sup>

**Open hysterectomy**  
Allocated OPEN expert surgeon<sup>4</sup>

1 Collective group of surgeons within a centre willing to operate on patients recruited into the LAVA trial. Not all surgeons within the LSU need to be willing to randomise but they should be prepared to perform a hysterectomy, according to their expertise, on patients following randomisation.

2 Surgeons to have performed a minimum of 30 cases and to have a current caseload of at least 12 cases per year. For surgeons to conduct both procedures, these criteria will need to be met for both types of hysterectomy. In light of the unprecedented restrictions on elective operating for benign conditions imposed by the Covid-19 pandemic, the required surgical caseload can be determined from the year preceding the SARS-COV-2 viral outbreak in March 2020.

3 The surgeon must consider the position for each individual patient. Only if they believe that either operation will be suitable for an individual patient can the patient then be recruited.

4 Participants must be made aware that their surgery may be conducted by another surgeon within the LSU with the appropriate expertise.



**Figure 2**  
Trial schema

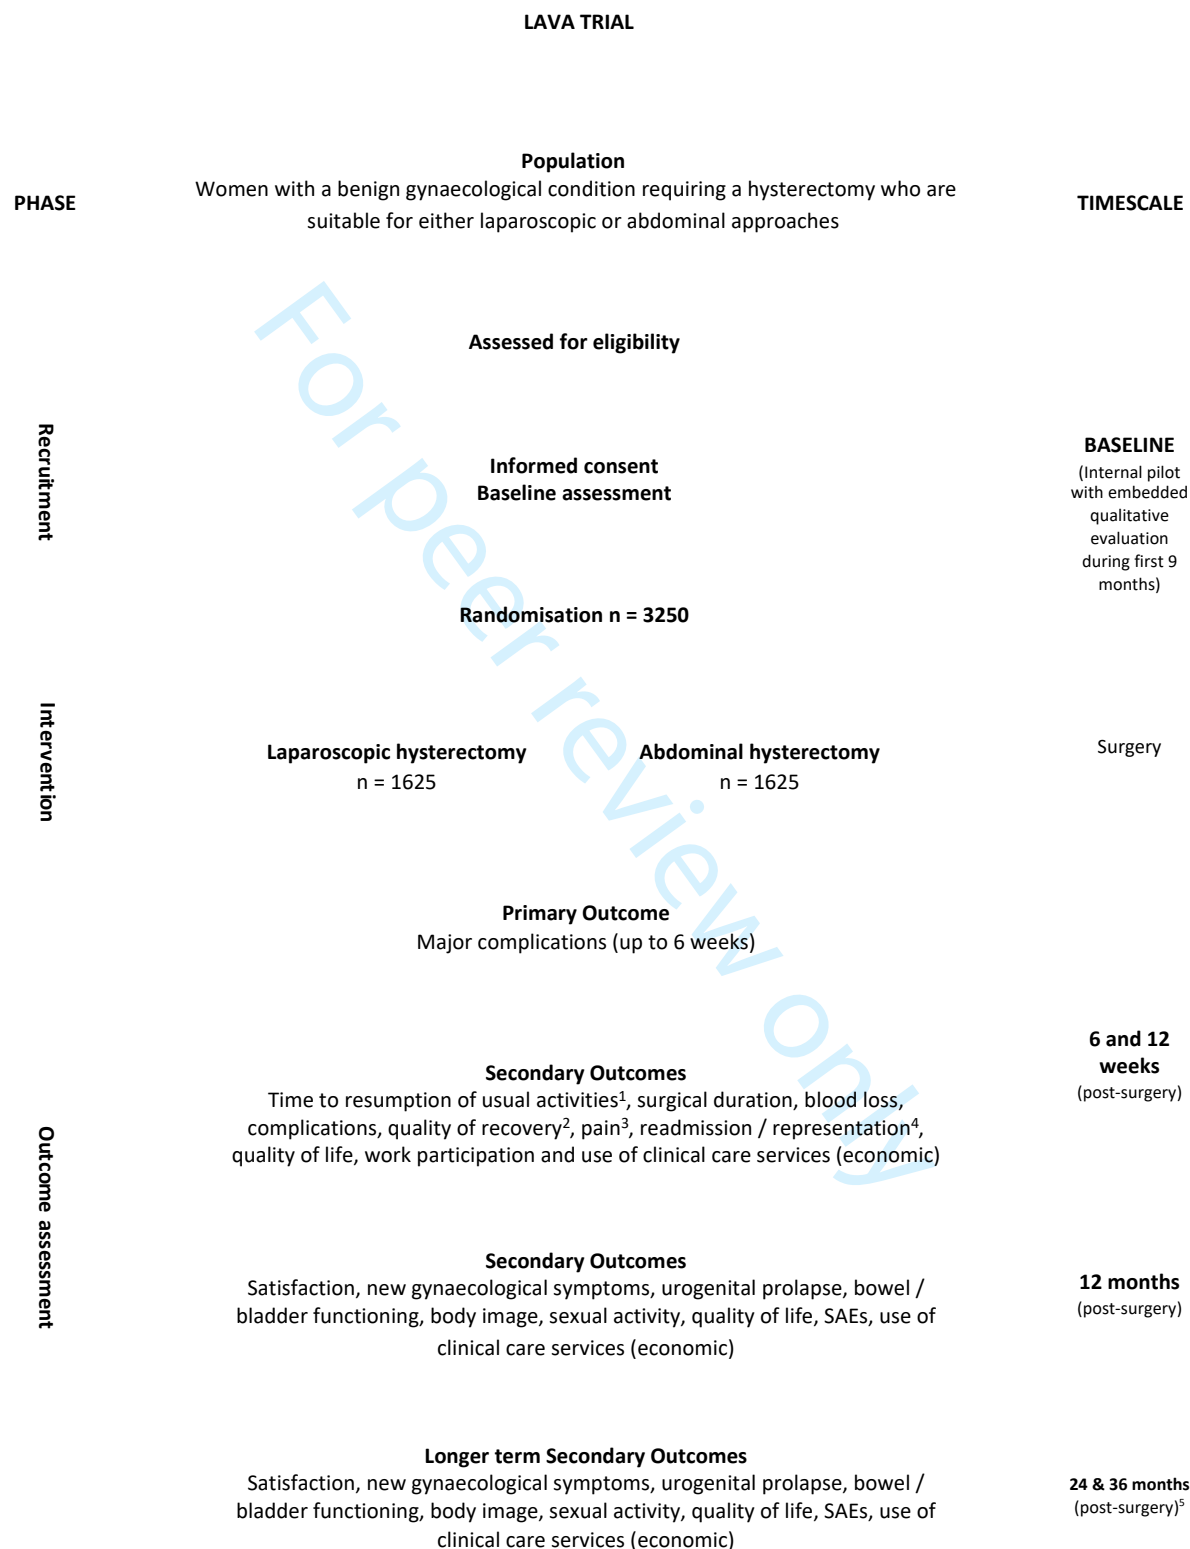

<sup>1</sup> Time from surgery to resumption of usual activities will continue to be evaluated until all 8 selected activities have been resumed

<sup>2</sup> 24 hours post-surgery

<sup>3</sup> Daily, up to and including 14 days post-surgery

<sup>4</sup> 6 weeks post-surgery only

<sup>5</sup> Restricted to subgroups of participants reaching these timepoints prior to close of the study i.e. when the last randomised patient reaches 12 months post-surgery

## Supplementary Table 1

### Summary of schedule of assessments

| Visit                                                                                  | Pre-randomisation         |          | Rand | Surgery | Post-surgery |               |          |                     |                   |                    |                                  |
|----------------------------------------------------------------------------------------|---------------------------|----------|------|---------|--------------|---------------|----------|---------------------|-------------------|--------------------|----------------------------------|
|                                                                                        | Screening and recruitment | Baseline |      |         | Surgery      | Hospital stay | Day 2-14 | Weekly Week 1 to 12 | 6 weeks + 28 days | 12 weeks + 28 days | Fortnightly weeks 13 to 26 (inc) |
| Eligibility check                                                                      | x                         |          |      |         |              |               |          |                     |                   |                    |                                  |
| Valid informed consent                                                                 | x                         |          |      |         |              |               |          |                     |                   |                    |                                  |
| Baseline demographic and medical questionnaire                                         |                           | x        |      |         |              |               |          |                     |                   |                    |                                  |
| Urogenital Distress Inventory (UDI)                                                    |                           | x        |      |         |              |               |          |                     |                   |                    | x                                |
| Defecatory Distress Inventory (DDI)                                                    |                           | x        |      |         |              |               |          |                     |                   |                    | x                                |
| Sexual Activity Questionnaire (SAQ)                                                    |                           | x        |      |         |              |               |          |                     |                   |                    | x                                |
| EuroQol (EQ-5D-5L and EQ VAS)                                                          |                           | x        |      |         |              |               |          | x                   | x                 |                    | x                                |
| Patient-Reported Outcomes Measurement Information System Physical Function (PROMIS-PF) |                           | x        |      |         |              |               | x        |                     |                   | x                  |                                  |
| Randomisation                                                                          |                           |          | x    |         |              |               |          |                     |                   |                    |                                  |
| Surgery CRF                                                                            |                           |          |      | x       |              |               |          |                     |                   |                    |                                  |
| Resource use CRF                                                                       |                           |          |      |         | x            |               |          |                     |                   |                    |                                  |
| Pain (Numerical Rating Scale - NRS) & analgesia questionnaire                          |                           |          |      |         | x            |               |          |                     |                   |                    |                                  |
| Time to discharge & complications                                                      |                           |          |      |         | x            |               |          |                     |                   |                    |                                  |

1  
2  
3  
4  
5  
6  
7  
8  
9  
10  
11  
12  
13  
14  
15  
16  
17  
18  
19  
20  
21  
22  
23  
24  
25  
26  
27  
28  
29  
30  
31  
32  
33  
34  
35  
36  
37  
38  
39  
40  
41  
42  
43  
44  
45  
46

|                                                                                        |  |  |   |  |   |   |   |   |   |   |   |   |
|----------------------------------------------------------------------------------------|--|--|---|--|---|---|---|---|---|---|---|---|
| Quality of Recovery-15 questionnaire*                                                  |  |  |   |  |   | x |   |   |   |   |   |   |
| Pain (NRS) symptom diary                                                               |  |  |   |  |   |   | x |   |   |   |   |   |
| Six week post-surgery questionnaire including health care utilisation                  |  |  |   |  |   |   |   |   | x |   |   |   |
| Work questionnaire / Work Productivity and Activity Impairment Questionnaire (WPAI-GH) |  |  |   |  |   |   |   |   |   | x |   |   |
| Six week post-surgery complication and representation form                             |  |  |   |  |   |   |   |   | x |   |   |   |
| Satisfaction with hysterectomy                                                         |  |  |   |  |   |   |   |   |   |   |   | x |
| New gynae symptoms                                                                     |  |  |   |  |   |   |   |   |   |   |   | x |
| Pelvic organ prolapse quantifications – POP-SS                                         |  |  | x |  |   |   |   |   |   |   |   | x |
| Body Image Scale (BIS)                                                                 |  |  |   |  |   |   |   |   |   |   |   | x |
| Contact with Community Social and Clinical Care Services form                          |  |  |   |  |   |   |   |   |   |   |   | x |
| Serious Adverse Events                                                                 |  |  |   |  | x | x | x | x | x | x | x | x |

Rand = randomisation

\* If patient discharged as a day-case then they should be instructed to complete at home at 24 hours post-surgery

\*\* The same 12-month post-surgery questionnaires will be sent to all participants reaching 24 and 36 months of follow up post-surgery, prior to close of the LAVA study; defined as when the last randomised patient reaches 12 months follow up post-surgery

|  |  |  |  |  |  |  |
|--|--|--|--|--|--|--|
|  |  |  |  |  |  |  |
|--|--|--|--|--|--|--|

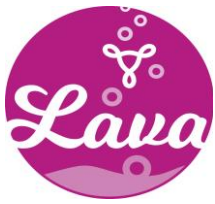

# Laparoscopic Versus Abdominal hysterectomy (LAVA)

## Participant Consent Form

Please initial inside each box to provide your consent to participate in each part of the study.

Please initial inside each box that you agree to take part in

|          |                                                                                                                                                                                                                                                                                                                                                                                                                                                                                                                                                                                                                                      |  |
|----------|--------------------------------------------------------------------------------------------------------------------------------------------------------------------------------------------------------------------------------------------------------------------------------------------------------------------------------------------------------------------------------------------------------------------------------------------------------------------------------------------------------------------------------------------------------------------------------------------------------------------------------------|--|
| <b>1</b> | I confirm that I have read and understand the participant information sheet (version __. __ and date __ / __ / ____ ) for the LAVA trial. I agree that I have had the opportunity to take time to consider my involvement in the trial and I have had the chance to ask questions, all of which have been answered to my satisfaction.                                                                                                                                                                                                                                                                                               |  |
| <b>2</b> | I agree that my involvement in the LAVA trial is voluntary, and I am free to withdraw at any time without the quality of my medical care or my legal rights being affected. I agree that if I decide to withdraw from the trial, any information that has already been analysed cannot be withdrawn. I understand that should I want to withdraw from the study then I will be contacted by a member of the study team and given the options described in the above participant information sheet about what other data can be collected from me and what happens to it, and that my response will be recorded on a withdrawal form. |  |
| <b>3</b> | I agree that my hospital research team can provide a copy of my consent form, and relevant personal information, including my name, home address, date of birth, telephone number, ethnicity, Body Mass Index (BMI), if I have had any caesarean sections, the size of my womb and other relevant details of my medical history including my hysterectomy to the researchers based at the University of Birmingham for use in the LAVA trial                                                                                                                                                                                         |  |
| <b>4</b> | I agree that relevant sections of my medical notes, and all of the information provided by me in trial related questionnaires will be transferred to members of the LAVA research team at the University of Birmingham. I agree that collaborators of the LAVA trial, and authorised representatives from the study sponsor (The University of Birmingham), regulatory authorities and my NHS trust can access my data where relevant such as my taking part in this research and safety monitoring.                                                                                                                                 |  |
| <b>5</b> | I agree that my data will be anonymised and used in combination with that of others to produce research outputs such as reports, presentations, publications and websites connected to the LAVA trial. I understand that I will not be individually identified in any publicly available output.                                                                                                                                                                                                                                                                                                                                     |  |

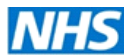

|  |  |  |  |  |  |  |
|--|--|--|--|--|--|--|
|  |  |  |  |  |  |  |
|--|--|--|--|--|--|--|

|           |                                                                                                                                                                                                                                                                                                                                                                                                                                                                                                                                                                                                                                                                                                                           |  |
|-----------|---------------------------------------------------------------------------------------------------------------------------------------------------------------------------------------------------------------------------------------------------------------------------------------------------------------------------------------------------------------------------------------------------------------------------------------------------------------------------------------------------------------------------------------------------------------------------------------------------------------------------------------------------------------------------------------------------------------------------|--|
| <b>6</b>  | I understand that all information collected from me for this study will be subject to the General Data Protection Regulation and Data Protection Act 2018. This information will be stored securely by the University of Birmingham, which is the data controller for the LAVA trial, for a minimum period of 10 years.                                                                                                                                                                                                                                                                                                                                                                                                   |  |
| <b>7</b>  | I give consent for members of the LAVA trial team to contact me by telephone, mobile, post, voice over the internet protocol - VOIP (e.g. Skype, Facetime etc) or email to request additional information such as missing data on questionnaires that I have completed.                                                                                                                                                                                                                                                                                                                                                                                                                                                   |  |
| <b>8</b>  | I agree that some anonymous information collected from me may be shared and/or made publicly available for other researchers to support other research in the future.                                                                                                                                                                                                                                                                                                                                                                                                                                                                                                                                                     |  |
| <b>9</b>  | I agree that my general practitioner(GP) is informed of my participation in the LAVA trial.                                                                                                                                                                                                                                                                                                                                                                                                                                                                                                                                                                                                                               |  |
| <b>10</b> | <p>I agree to my study number and mobile telephone number being passed to an external company (Textlocal) who will send me text messages containing a link that will take me to a questionnaire hosted by the University of Birmingham telling them which of the recovery goals I set before my operation I have reached.</p> <p>I understand that only my study number and mobile telephone number will be passed to Textlocal and that these, will be securely encrypted whilst being stored by Textlocal. I understand that my data will not be used by Textlocal for any other purpose.</p> <p>I understand that Textlocal will securely delete all the information they hold on me at the end of the LAVA study.</p> |  |
| <b>11</b> | I understand the information that has been given to me about the LAVA trial and I agree to take part in this study.                                                                                                                                                                                                                                                                                                                                                                                                                                                                                                                                                                                                       |  |

\_\_\_\_\_  
*Name of Participant*

\_\_\_\_\_  
*Date*

\_\_\_\_\_  
*Signature*

\_\_\_\_\_  
*Name of Person taking Consent*

\_\_\_\_\_  
*Date*

\_\_\_\_\_  
*Signature*

**Master copy for Site File, 1 copy for participant notes, 1 copy for Participant, 1 copy for LAVA Trial Office**

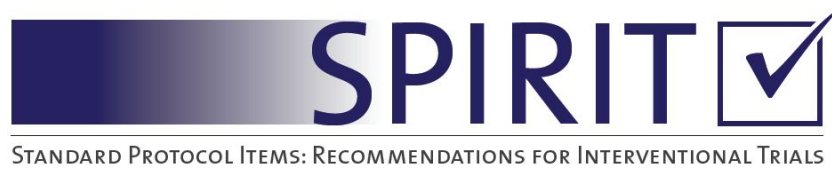

SPIRIT 2013 Checklist: Recommended items to address in a clinical trial protocol and related documents\*

| Section/item                      | Item No | Description                                                                                                                                                                                                                                                                                                                                                                                                                                  |
|-----------------------------------|---------|----------------------------------------------------------------------------------------------------------------------------------------------------------------------------------------------------------------------------------------------------------------------------------------------------------------------------------------------------------------------------------------------------------------------------------------------|
| <b>Administrative information</b> |         |                                                                                                                                                                                                                                                                                                                                                                                                                                              |
| Title                             | 1       | Descriptive title identifying the study design, population, interventions, and, if applicable, trial acronym<br>Page 1, lines (1-2)                                                                                                                                                                                                                                                                                                          |
| Trial registration                | 2       | Trial identifier and registry name. If not yet registered, name of intended registry<br>Page 4, line 76                                                                                                                                                                                                                                                                                                                                      |
| Protocol version                  | 3       | Date and version identifier<br>Page 2, lines (43,44)                                                                                                                                                                                                                                                                                                                                                                                         |
| Funding                           | 4       | Sources and types of financial, material, and other support<br>Page 35, lines (792-793)                                                                                                                                                                                                                                                                                                                                                      |
| Roles and responsibilities        | 5a      | Names, affiliations, and roles of protocol contributors<br>Pages (1-2), lines (4-34)                                                                                                                                                                                                                                                                                                                                                         |
|                                   | 5b      | Name and contact information for the trial sponsor<br>Page 31, lines (702-705)                                                                                                                                                                                                                                                                                                                                                               |
|                                   | 5c      | Role of study sponsor and funders, if any, in study design; collection, management, analysis, and interpretation of data; writing of the report; and the decision to submit the report for publication, including whether they will have ultimate authority over any of these activities<br>Page 26, lines (600-602)<br>Page 32, lines (737-744)<br>Page 33, lines (764-766)<br>Table 3 (data source): please check imaging, and recruitment |

1  
2 5d Composition, roles, and responsibilities of the coordinating centre,  
3 steering committee, endpoint adjudication committee, data  
4 management team, and other individuals or groups overseeing the  
5 trial, if applicable (see Item 21a for data monitoring committee)  
6  
7

8 Pages (31,32), lines (708-725)  
9  
10

## 11 Introduction

12  
13 Background and 6a Description of research question and justification for undertaking the  
14 rationale trial, including summary of relevant studies (published and  
15 unpublished) examining benefits and harms for each intervention  
16  
17

18 Page 6, lines (92-125)  
19

20 6b Explanation for choice of comparators  
21  
22

23 Pages 11, lines (225-232)  
24

25 Objectives 7 Specific objectives or hypotheses  
26  
27

28 Page 7, lines (130-134)  
29

30 Trial design 8 Description of trial design including type of trial (eg, parallel group,  
31 crossover, factorial, single group), allocation ratio, and framework (eg,  
32 superiority, equivalence, noninferiority, exploratory)  
33  
34

35 Page 8, lines (144-176)  
36

## 37 Methods: Participants, interventions, and outcomes

38 Study setting 9 Description of study settings (eg, community clinic, academic hospital)  
39 and list of countries where data will be collected. Reference to where  
40 list of study sites can be obtained  
41  
42

43 Page 8, lines (150-153)  
44

45 Eligibility criteria 10 Inclusion and exclusion criteria for participants. If applicable, eligibility  
46 criteria for study centres and individuals who will perform the  
47 interventions (eg, surgeons, psychotherapists)  
48  
49

50 Pages (10-11), lines (206-223)  
51

52 Page (14), lines (303-308)  
53

54 The expertise design process for eligible centres is depicted in (Figure  
55 1)  
56  
57  
58  
59  
60

|    |                      |     |                                                                                                                                                                                                                                                                                                                                                                                |
|----|----------------------|-----|--------------------------------------------------------------------------------------------------------------------------------------------------------------------------------------------------------------------------------------------------------------------------------------------------------------------------------------------------------------------------------|
| 1  |                      |     |                                                                                                                                                                                                                                                                                                                                                                                |
| 2  | Interventions        | 11a | Interventions for each group with sufficient detail to allow replication, including how and when they will be administered                                                                                                                                                                                                                                                     |
| 3  |                      |     |                                                                                                                                                                                                                                                                                                                                                                                |
| 4  |                      |     |                                                                                                                                                                                                                                                                                                                                                                                |
| 5  |                      |     | Page 14, lines (302-311)                                                                                                                                                                                                                                                                                                                                                       |
| 6  |                      |     |                                                                                                                                                                                                                                                                                                                                                                                |
| 7  |                      | 11b | Criteria for discontinuing or modifying allocated interventions for a given trial participant (eg, drug dose change in response to harms, participant request, or improving/worsening disease)                                                                                                                                                                                 |
| 8  |                      |     |                                                                                                                                                                                                                                                                                                                                                                                |
| 9  |                      |     |                                                                                                                                                                                                                                                                                                                                                                                |
| 10 |                      |     | Page 12, lines (279-283)                                                                                                                                                                                                                                                                                                                                                       |
| 11 |                      |     |                                                                                                                                                                                                                                                                                                                                                                                |
| 12 |                      |     |                                                                                                                                                                                                                                                                                                                                                                                |
| 13 |                      | 11c | Strategies to improve adherence to intervention protocols, and any procedures for monitoring adherence (eg, drug tablet return, laboratory tests)                                                                                                                                                                                                                              |
| 14 |                      |     |                                                                                                                                                                                                                                                                                                                                                                                |
| 15 |                      |     | Page 13, lines (264-278)                                                                                                                                                                                                                                                                                                                                                       |
| 16 |                      |     | Page 31, lines (712-716)                                                                                                                                                                                                                                                                                                                                                       |
| 17 |                      |     |                                                                                                                                                                                                                                                                                                                                                                                |
| 18 |                      |     |                                                                                                                                                                                                                                                                                                                                                                                |
| 19 |                      |     |                                                                                                                                                                                                                                                                                                                                                                                |
| 20 |                      |     |                                                                                                                                                                                                                                                                                                                                                                                |
| 21 |                      |     |                                                                                                                                                                                                                                                                                                                                                                                |
| 22 |                      | 11d | Relevant concomitant care and interventions that are permitted or prohibited during the trial                                                                                                                                                                                                                                                                                  |
| 23 |                      |     |                                                                                                                                                                                                                                                                                                                                                                                |
| 24 |                      |     |                                                                                                                                                                                                                                                                                                                                                                                |
| 25 |                      |     |                                                                                                                                                                                                                                                                                                                                                                                |
| 26 |                      |     | Page 11, lines (218-223)                                                                                                                                                                                                                                                                                                                                                       |
| 27 |                      |     |                                                                                                                                                                                                                                                                                                                                                                                |
| 28 | Outcomes             | 12  | Primary, secondary, and other outcomes, including the specific measurement variable (eg, systolic blood pressure), analysis metric (eg, change from baseline, final value, time to event), method of aggregation (eg, median, proportion), and time point for each outcome. Explanation of the clinical relevance of chosen efficacy and harm outcomes is strongly recommended |
| 29 |                      |     |                                                                                                                                                                                                                                                                                                                                                                                |
| 30 |                      |     |                                                                                                                                                                                                                                                                                                                                                                                |
| 31 |                      |     |                                                                                                                                                                                                                                                                                                                                                                                |
| 32 |                      |     |                                                                                                                                                                                                                                                                                                                                                                                |
| 33 |                      |     |                                                                                                                                                                                                                                                                                                                                                                                |
| 34 |                      |     |                                                                                                                                                                                                                                                                                                                                                                                |
| 35 |                      |     |                                                                                                                                                                                                                                                                                                                                                                                |
| 36 |                      |     |                                                                                                                                                                                                                                                                                                                                                                                |
| 37 |                      |     | Pages (15-20), lines (327-446)                                                                                                                                                                                                                                                                                                                                                 |
| 38 |                      |     |                                                                                                                                                                                                                                                                                                                                                                                |
| 39 |                      |     |                                                                                                                                                                                                                                                                                                                                                                                |
| 40 | Participant timeline | 13  | Time schedule of enrolment, interventions (including any run-ins and washouts), assessments, and visits for participants. A schematic diagram is highly recommended (see Figure)                                                                                                                                                                                               |
| 41 |                      |     |                                                                                                                                                                                                                                                                                                                                                                                |
| 42 |                      |     |                                                                                                                                                                                                                                                                                                                                                                                |
| 43 |                      |     |                                                                                                                                                                                                                                                                                                                                                                                |
| 44 |                      |     |                                                                                                                                                                                                                                                                                                                                                                                |
| 45 |                      |     | Trial schema (Figure 2)                                                                                                                                                                                                                                                                                                                                                        |
| 46 |                      |     |                                                                                                                                                                                                                                                                                                                                                                                |
| 47 | Sample size          | 14  | Estimated number of participants needed to achieve study objectives and how it was determined, including clinical and statistical assumptions supporting any sample size calculations                                                                                                                                                                                          |
| 48 |                      |     |                                                                                                                                                                                                                                                                                                                                                                                |
| 49 |                      |     |                                                                                                                                                                                                                                                                                                                                                                                |
| 50 |                      |     |                                                                                                                                                                                                                                                                                                                                                                                |
| 51 |                      |     |                                                                                                                                                                                                                                                                                                                                                                                |
| 52 |                      |     | Pages (21-22), lines (449-472)                                                                                                                                                                                                                                                                                                                                                 |
| 53 |                      |     |                                                                                                                                                                                                                                                                                                                                                                                |
| 54 | Recruitment          | 15  | Strategies for achieving adequate participant enrolment to reach target sample size                                                                                                                                                                                                                                                                                            |
| 55 |                      |     |                                                                                                                                                                                                                                                                                                                                                                                |
| 56 |                      |     |                                                                                                                                                                                                                                                                                                                                                                                |
| 57 |                      |     |                                                                                                                                                                                                                                                                                                                                                                                |
| 58 |                      |     | Page 13, lines (262-266)                                                                                                                                                                                                                                                                                                                                                       |
| 59 |                      |     |                                                                                                                                                                                                                                                                                                                                                                                |
| 60 |                      |     |                                                                                                                                                                                                                                                                                                                                                                                |



## Methods: Assignment of interventions (for controlled trials)

### Allocation:

|                                  |     |                                                                                                                                                                                                                                                                                                                                                          |
|----------------------------------|-----|----------------------------------------------------------------------------------------------------------------------------------------------------------------------------------------------------------------------------------------------------------------------------------------------------------------------------------------------------------|
| Sequence generation              | 16a | Method of generating the allocation sequence (eg, computer-generated random numbers), and list of any factors for stratification. To reduce predictability of a random sequence, details of any planned restriction (eg, blocking) should be provided in a separate document that is unavailable to those who enrol participants or assign interventions |
|                                  |     | Page 14, lines (286-296)                                                                                                                                                                                                                                                                                                                                 |
| Allocation concealment mechanism | 16b | Mechanism of implementing the allocation sequence (eg, central telephone; sequentially numbered, opaque, sealed envelopes), describing any steps to conceal the sequence until interventions are assigned                                                                                                                                                |
|                                  |     | Page 13, lines (267-278)                                                                                                                                                                                                                                                                                                                                 |
| Implementation                   | 16c | Who will generate the allocation sequence, who will enrol participants, and who will assign participants to interventions                                                                                                                                                                                                                                |
|                                  |     | Pages (12-14), lines (253-296)                                                                                                                                                                                                                                                                                                                           |
| Blinding (masking)               | 17a | Who will be blinded after assignment to interventions (eg, trial participants, care providers, outcome assessors, data analysts), and how                                                                                                                                                                                                                |
|                                  |     | Page 14, lines (298-300)                                                                                                                                                                                                                                                                                                                                 |
|                                  | 17b | If blinded, circumstances under which unblinding is permissible, and procedure for revealing a participant's allocated intervention during the trial                                                                                                                                                                                                     |
|                                  |     | N/A- See above (17a)                                                                                                                                                                                                                                                                                                                                     |

## Methods: Data collection, management, and analysis

|                         |     |                                                                                                                                                                                                                                                                                                                                                                                                              |
|-------------------------|-----|--------------------------------------------------------------------------------------------------------------------------------------------------------------------------------------------------------------------------------------------------------------------------------------------------------------------------------------------------------------------------------------------------------------|
| Data collection methods | 18a | Plans for assessment and collection of outcome, baseline, and other trial data, including any related processes to promote data quality (eg, duplicate measurements, training of assessors) and a description of study instruments (eg, questionnaires, laboratory tests) along with their reliability and validity, if known. Reference to where data collection forms can be found, if not in the protocol |
|                         |     | Page 26, lines (577-585)                                                                                                                                                                                                                                                                                                                                                                                     |
|                         |     | Page 24, lines (516-525)                                                                                                                                                                                                                                                                                                                                                                                     |

- 1  
2  
3  
4  
5  
6  
7  
8  
9  
10  
11  
12  
13  
14  
15  
16  
17  
18  
19  
20  
21  
22  
23  
24  
25  
26  
27  
28  
29  
30  
31  
32  
33  
34  
35  
36  
37  
38  
39  
40  
41  
42  
43  
44  
45  
46  
47  
48  
49  
50  
51  
52  
53  
54  
55  
56  
57  
58  
59  
60
- 18b Plans to promote participant retention and complete follow-up, including list of any outcome data to be collected for participants who discontinue or deviate from intervention protocols
- Page 13, lines (279-283)
- Data management 19 Plans for data entry, coding, security, and storage, including any related processes to promote data quality (eg, double data entry; range checks for data values). Reference to where details of data management procedures can be found, if not in the protocol
- Pages (26-27), lines (598-608)  
Table 3- Data Source
- Statistical methods 20a Statistical methods for analysing primary and secondary outcomes. Reference to where other details of the statistical analysis plan can be found, if not in the protocol
- Page (21-24), lines (481-525)
- 20b Methods for any additional analyses (eg, subgroup and adjusted analyses)
- Pages (24-25), lines (527-575)
- 20c Definition of analysis population relating to protocol non-adherence (eg, as randomised analysis), and any statistical methods to handle missing data (eg, multiple imputation)
- Page 24, lines (534-538)
- Methods: Monitoring**
- Data monitoring 21a Composition of data monitoring committee (DMC); summary of its role and reporting structure; statement of whether it is independent from the sponsor and competing interests; and reference to where further details about its charter can be found, if not in the protocol. Alternatively, an explanation of why a DMC is not needed
- Page 32, lines (727-734)
- 21b Description of any interim analyses and stopping guidelines, including who will have access to these interim results and make the final decision to terminate the trial
- Page 24, lines (540-546)

1  
2 Harms 22 Plans for collecting, assessing, reporting, and managing solicited and  
3 spontaneously reported adverse events and other unintended effects  
4 of trial interventions or trial conduct

5  
6  
7 Page 26, lines (587-595)

8  
9 Auditing 23 Frequency and procedures for auditing trial conduct, if any, and  
10 whether the process will be independent from investigators and the  
11 sponsor

12  
13  
14 Page 34, lines (773-776)

15  
16 **Ethics and dissemination**

17  
18 Research ethics 24 Plans for seeking research ethics committee/institutional review board  
19 approval (REC/IRB) approval

20  
21  
22 Page 30, lines (669-676)

23  
24 Protocol 25 Plans for communicating important protocol modifications (eg,  
25 amendments changes to eligibility criteria, outcomes, analyses) to relevant parties  
26 (eg, investigators, REC/IRBs, trial participants, trial registries, journals,  
27 regulators)

28  
29  
30 Pages (32-33), lines (737-744)

31  
32 Consent or assent 26a Who will obtain informed consent or assent from potential trial  
33 participants or authorised surrogates, and how (see Item 32)

34  
35  
36 Page 12, lines (241-247)

37  
38 26b Additional consent provisions for collection and use of participant data  
39 and biological specimens in ancillary studies, if applicable

40  
41  
42 N/A

43  
44 Confidentiality 27 How personal information about potential and enrolled participants will  
45 be collected, shared, and maintained in order to protect confidentiality  
46 before, during, and after the trial

47  
48  
49 Pages (30-31), lines (684-697)

50  
51 Declaration of 28 Financial and other competing interests for principal investigators for  
52 interests the overall trial and each study site

53  
54  
55 Page 34, line 790

|    |                   |     |                                                                              |
|----|-------------------|-----|------------------------------------------------------------------------------|
| 1  |                   |     |                                                                              |
| 2  | Access to data    | 29  | Statement of who will have access to the final trial dataset, and            |
| 3  |                   |     | disclosure of contractual agreements that limit such access for              |
| 4  |                   |     | investigators                                                                |
| 5  |                   |     |                                                                              |
| 6  |                   |     |                                                                              |
| 7  |                   |     | Page 33, lines (747-752)                                                     |
| 8  |                   |     |                                                                              |
| 9  | Ancillary and     | 30  | Provisions, if any, for ancillary and post-trial care, and for               |
| 10 | post-trial care   |     | compensation to those who suffer harm from trial participation               |
| 11 |                   |     |                                                                              |
| 12 |                   |     | Page 33, lines (755-759)                                                     |
| 13 |                   |     |                                                                              |
| 14 | Dissemination     | 31a | Plans for investigators and sponsor to communicate trial results to          |
| 15 | policy            |     | participants, healthcare professionals, the public, and other relevant       |
| 16 |                   |     | groups (eg, via publication, reporting in results databases, or other        |
| 17 |                   |     | data sharing arrangements), including any publication restrictions           |
| 18 |                   |     |                                                                              |
| 19 |                   |     |                                                                              |
| 20 |                   |     | Page 30, lines (678-681)                                                     |
| 21 |                   |     | Page 34, lines (768-770)                                                     |
| 22 |                   |     |                                                                              |
| 23 |                   |     |                                                                              |
| 24 |                   | 31b | Authorship eligibility guidelines and any intended use of professional       |
| 25 |                   |     | writers                                                                      |
| 26 |                   |     |                                                                              |
| 27 |                   |     | Page 34, lines (785-788)                                                     |
| 28 |                   |     |                                                                              |
| 29 |                   |     |                                                                              |
| 30 |                   | 31c | Plans, if any, for granting public access to the full protocol, participant- |
| 31 |                   |     | level dataset, and statistical code                                          |
| 32 |                   |     |                                                                              |
| 33 |                   |     | Page 33, lines (749-752)                                                     |
| 34 |                   |     | Page 34, lines (768-770)                                                     |
| 35 |                   |     |                                                                              |
| 36 |                   |     |                                                                              |
| 37 | <b>Appendices</b> |     |                                                                              |
| 38 |                   |     |                                                                              |
| 39 | Informed consent  | 32  | Model consent form and other related documentation given to                  |
| 40 | materials         |     | participants and authorised surrogates                                       |
| 41 |                   |     |                                                                              |
| 42 |                   |     | Please see supplementary file                                                |
| 43 |                   |     |                                                                              |
| 44 | Biological        | 33  | Plans for collection, laboratory evaluation, and storage of biological       |
| 45 | specimens         |     | specimens for genetic or molecular analysis in the current trial and for     |
| 46 |                   |     | future use in ancillary studies, if applicable                               |
| 47 |                   |     |                                                                              |
| 48 |                   |     |                                                                              |
| 49 |                   |     | N/A                                                                          |

\*It is strongly recommended that this checklist be read in conjunction with the SPIRIT 2013 Explanation & Elaboration for important clarification on the items. Amendments to the protocol should be tracked and dated. The SPIRIT checklist is copyrighted by the SPIRIT Group under the Creative Commons "[Attribution-NonCommercial-NoDerivs 3.0 Unported](https://creativecommons.org/licenses/by-nc-nd/3.0/)" license.
