# Supplementary material for: LAparoscopic Versus Abdominal hysterectomy (LAVA): protocol of a randomised controlled trial
Source: PubMed Central journal article supplement — BMJ Open. 2023 Sep 5;13(9):e070218. doi: 10.1136/bmjopen-2022-070218 (PMC10481847; doi:10.1136/bmjopen-2022-070218), 2023-09-05
Supplement: bmjopen-2022-070218supp001.pdf [file bmjopen-2022-070218supp001.pdf]

**Supplementary Table 1**

## Summary of schedule of assessments

| Visit                                                                                  | Pre-randomisation         |          | Rand | Surgery | Post-surgery  |          |                     |                   |                    |                                  |                        |
|----------------------------------------------------------------------------------------|---------------------------|----------|------|---------|---------------|----------|---------------------|-------------------|--------------------|----------------------------------|------------------------|
|                                                                                        | Screening and recruitment | Baseline |      | Surgery | Hospital stay | Day 2-14 | Weekly Week 1 to 12 | 6 weeks + 28 days | 12 weeks + 28 days | Fortnightly weeks 13 to 26 (inc) | Month 12 + 6 months .. |
| Eligibility check                                                                      | x                         |          |      |         |               |          |                     |                   |                    |                                  |                        |
| Valid informed consent                                                                 | x                         |          |      |         |               |          |                     |                   |                    |                                  |                        |
| Baseline demographic and medical questionnaire                                         |                           | x        |      |         |               |          |                     |                   |                    |                                  |                        |
| Urogenital Distress Inventory (UDI)                                                    |                           | x        |      |         |               |          |                     |                   |                    |                                  | x                      |
| Defecatory Distress Inventory (DDI)                                                    |                           | x        |      |         |               |          |                     |                   |                    |                                  | x                      |
| Sexual Activity Questionnaire (SAQ)                                                    |                           | x        |      |         |               |          |                     |                   |                    |                                  | x                      |
| EuroQol (EQ-5D-5L and EQ VAS)                                                          |                           | x        |      |         |               |          |                     | x                 | x                  |                                  | x                      |
| Patient-Reported Outcomes Measurement Information System Physical Function (PROMIS-PF) |                           | x        |      |         |               |          | x                   |                   |                    | x                                |                        |
| Randomisation                                                                          |                           |          | x    |         |               |          |                     |                   |                    |                                  |                        |
| Surgery CRF                                                                            |                           |          |      | x       |               |          |                     |                   |                    |                                  |                        |
| Resource use CRF                                                                       |                           |          |      |         | x             |          |                     |                   |                    |                                  |                        |
| Pain (Numerical Rating Scale - NRS) & analgesia questionnaire                          |                           |          |      |         | x             |          |                     |                   |                    |                                  |                        |
| Time to discharge & complications                                                      |                           |          |      |         | x             |          |                     |                   |                    |                                  |                        |

|                                                                                        |  |   |  |   |   |   |   |   |   |   |   |
|----------------------------------------------------------------------------------------|--|---|--|---|---|---|---|---|---|---|---|
| Quality of Recovery-15 questionnaire*                                                  |  |   |  |   | X |   |   |   |   |   |   |
| Pain (NRS) symptom diary                                                               |  |   |  |   |   | X |   |   |   |   |   |
| Six week post-surgery questionnaire including health care utilisation                  |  |   |  |   |   |   |   | X |   |   |   |
| Work questionnaire / Work Productivity and Activity Impairment Questionnaire (WPAI-GH) |  |   |  |   |   |   |   |   | X |   |   |
| Six week post-surgery complication and representation form                             |  |   |  |   |   |   |   | X |   |   |   |
| Satisfaction with hysterectomy                                                         |  |   |  |   |   |   |   |   |   |   | X |
| New gynae symptoms                                                                     |  |   |  |   |   |   |   |   |   |   | X |
| Pelvic organ prolapse quantifications – POP-SS                                         |  | X |  |   |   |   |   |   |   |   | X |
| Body Image Scale (BIS)                                                                 |  |   |  |   |   |   |   |   |   |   | X |
| Contact with Community Social and Clinical Care Services form                          |  |   |  |   |   |   |   |   |   |   | X |
| Serious Adverse Events                                                                 |  |   |  | X | X | X | X | X | X | X | X |

Rand = randomisation

\* If patient discharged as a day-case then they should be instructed to complete at home at 24 hours post-surgery

\*\* The same 12-month post-surgery questionnaires will be sent to all participants reaching 24 and 36 months of follow up post-surgery, prior to close of the LAVA study; defined as when the last randomised patient reaches 12 months follow up post-surgery
