# Supplementary material for: LAparoscopic Versus Abdominal hysterectomy (LAVA): protocol of a randomised controlled trial
Source: PubMed Central journal article supplement — BMJ Open. 2023 Sep 5;13(9):e070218. doi: 10.1136/bmjopen-2022-070218 (PMC10481847; doi:10.1136/bmjopen-2022-070218), 2023-09-05
Supplement: bmjopen-2022-070218supp002.pdf [file bmjopen-2022-070218supp002.pdf]

|  |  |  |  |  |  |  |
|--|--|--|--|--|--|--|
|  |  |  |  |  |  |  |
|--|--|--|--|--|--|--|

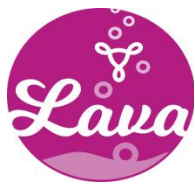

## Laparoscopic Versus Abdominal hysterectomy (LAVA)

### Participant Consent Form

Please initial inside each box to provide your consent to participate in each part of the study.

Please initial inside each box that you agree to take part in

|          |                                                                                                                                                                                                                                                                                                                                                                                                                                                                                                                                                                                                                                      |  |
|----------|--------------------------------------------------------------------------------------------------------------------------------------------------------------------------------------------------------------------------------------------------------------------------------------------------------------------------------------------------------------------------------------------------------------------------------------------------------------------------------------------------------------------------------------------------------------------------------------------------------------------------------------|--|
| <b>1</b> | I confirm that I have read and understand the participant information sheet (version __. __ and date __ / __ / __ __ __) for the LAVA trial. I agree that I have had the opportunity to take time to consider my involvement in the trial and I have had the chance to ask questions, all of which have been answered to my satisfaction.                                                                                                                                                                                                                                                                                            |  |
| <b>2</b> | I agree that my involvement in the LAVA trial is voluntary, and I am free to withdraw at any time without the quality of my medical care or my legal rights being affected. I agree that if I decide to withdraw from the trial, any information that has already been analysed cannot be withdrawn. I understand that should I want to withdraw from the study then I will be contacted by a member of the study team and given the options described in the above participant information sheet about what other data can be collected from me and what happens to it, and that my response will be recorded on a withdrawal form. |  |
| <b>3</b> | I agree that my hospital research team can provide a copy of my consent form, and relevant personal information, including my name, home address, date of birth, telephone number, ethnicity, Body Mass Index (BMI), if I have had any caesarean sections, the size of my womb and other relevant details of my medical history including my hysterectomy to the researchers based at the University of Birmingham for use in the LAVA trial                                                                                                                                                                                         |  |
| <b>4</b> | I agree that relevant sections of my medical notes, and all of the information provided by me in trial related questionnaires will be transferred to members of the LAVA research team at the University of Birmingham. I agree that collaborators of the LAVA trial, and authorised representatives from the study sponsor (The University of Birmingham), regulatory authorities and my NHS trust can access my data where relevant such as my taking part in this research and safety monitoring.                                                                                                                                 |  |
| <b>5</b> | I agree that my data will be anonymised and used in combination with that of others to produce research outputs such as reports, presentations, publications and websites connected to the LAVA trial. I understand that I will not be individually identified in any publicly available output.                                                                                                                                                                                                                                                                                                                                     |  |

|  |  |  |  |  |  |  |
|--|--|--|--|--|--|--|
|  |  |  |  |  |  |  |
|--|--|--|--|--|--|--|

|           |                                                                                                                                                                                                                                                                                                                                                                                                                                                                                                                                                                                                                                                                                                                           |  |
|-----------|---------------------------------------------------------------------------------------------------------------------------------------------------------------------------------------------------------------------------------------------------------------------------------------------------------------------------------------------------------------------------------------------------------------------------------------------------------------------------------------------------------------------------------------------------------------------------------------------------------------------------------------------------------------------------------------------------------------------------|--|
| <b>6</b>  | I understand that all information collected from me for this study will be subject to the General Data Protection Regulation and Data Protection Act 2018. This information will be stored securely by the University of Birmingham, which is the data controller for the LAVA trial, for a minimum period of 10 years.                                                                                                                                                                                                                                                                                                                                                                                                   |  |
| <b>7</b>  | I give consent for members of the LAVA trial team to contact me by telephone, mobile, post, voice over the internet protocol - VOIP (e.g. Skype, Facetime etc) or email to request additional information such as missing data on questionnaires that I have completed.                                                                                                                                                                                                                                                                                                                                                                                                                                                   |  |
| <b>8</b>  | I agree that some anonymous information collected from me may be shared and/or made publicly available for other researchers to support other research in the future.                                                                                                                                                                                                                                                                                                                                                                                                                                                                                                                                                     |  |
| <b>9</b>  | I agree that my general practitioner(GP) is informed of my participation in the LAVA trial.                                                                                                                                                                                                                                                                                                                                                                                                                                                                                                                                                                                                                               |  |
| <b>10</b> | <p>I agree to my study number and mobile telephone number being passed to an external company (Textlocal) who will send me text messages containing a link that will take me to a questionnaire hosted by the University of Birmingham telling them which of the recovery goals I set before my operation I have reached.</p> <p>I understand that only my study number and mobile telephone number will be passed to Textlocal and that these, will be securely encrypted whilst being stored by Textlocal. I understand that my data will not be used by Textlocal for any other purpose.</p> <p>I understand that Textlocal will securely delete all the information they hold on me at the end of the LAVA study.</p> |  |
| <b>11</b> | I understand the information that has been given to me about the LAVA trial and I agree to take part in this study.                                                                                                                                                                                                                                                                                                                                                                                                                                                                                                                                                                                                       |  |

---

*Name of Participant*

---

*Date*

---

*Signature*

---

*Name of Person taking Consent*

---

*Date*

---

*Signature*

**Master copy for Site File, 1 copy for participant notes, 1 copy for Participant, 1 copy for LAVA Trial Office**
